# Supplementary material for: Palladium-Catalyzed Room Temperature Acylative Cross-Coupling of Activated Amides with Trialkylboranes
Source: PubMed Central journal article supplement (PMC6222728; doi:10.3390/molecules23102412), 2018-09-20
Supplement: molecules-23-02412-s001.pdf [file molecules-23-02412-s001.pdf]

## Supplementary Materials

### Palladium-Catalyzed Room Temperature Acylative Cross-Coupling of Activated Amides with Trialkylboranes

Weijia Shi and Gang Zou

School of Chemistry & Molecular Engineering, East China University of Science & Technology, 130 Meilong Rd, Shanghai, China

Copies of  $^1\text{H}$  NMR,  $^{13}\text{C}$  NMR **3a-3n** and HRMS Spectrum of **3l**

Figure S1.  $^1\text{H}$  NMR of 1-(4-methoxyphenyl)propanone (3a)

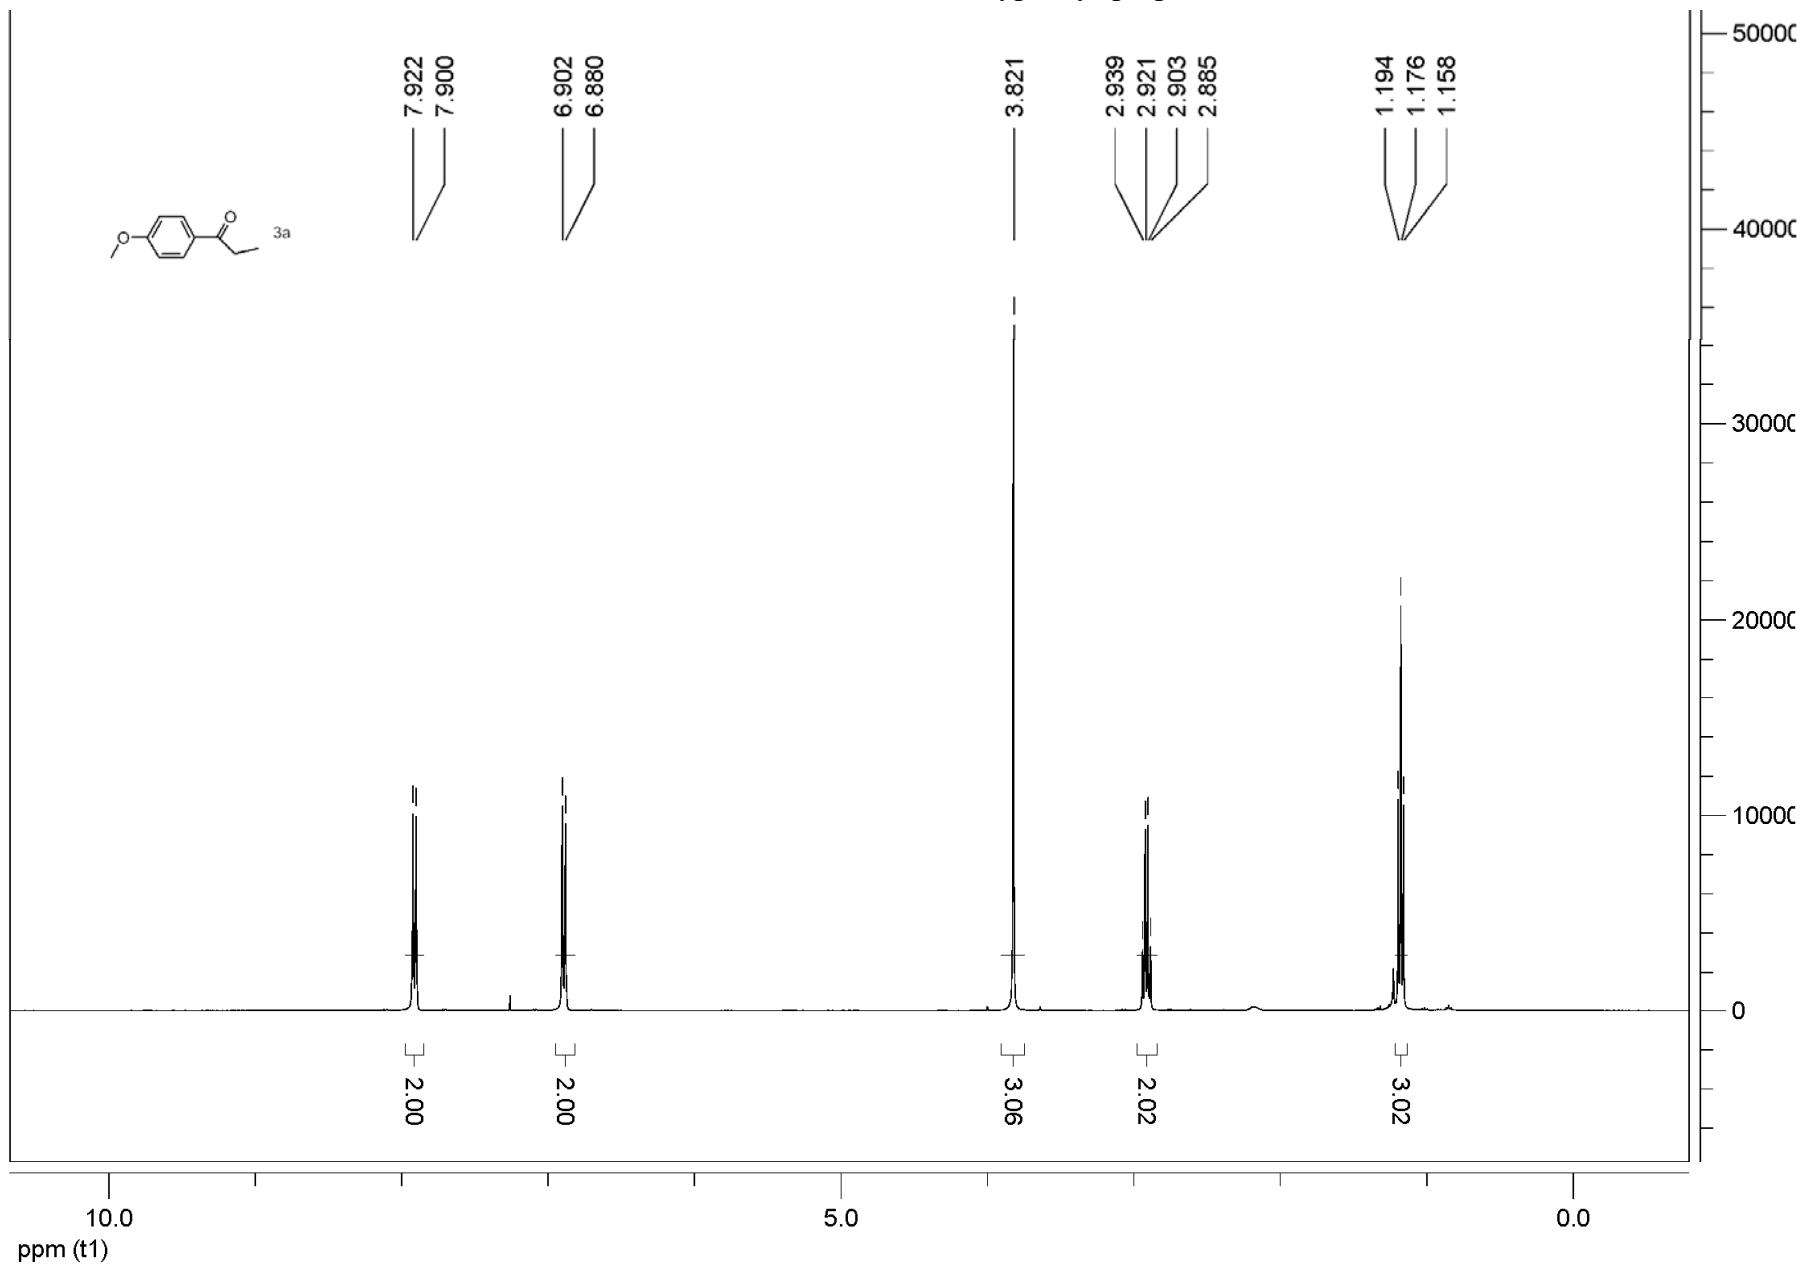

Figure S2.  $^{13}\text{C}$  NMR of 1-(4-methoxyphenyl)propanone (3a)

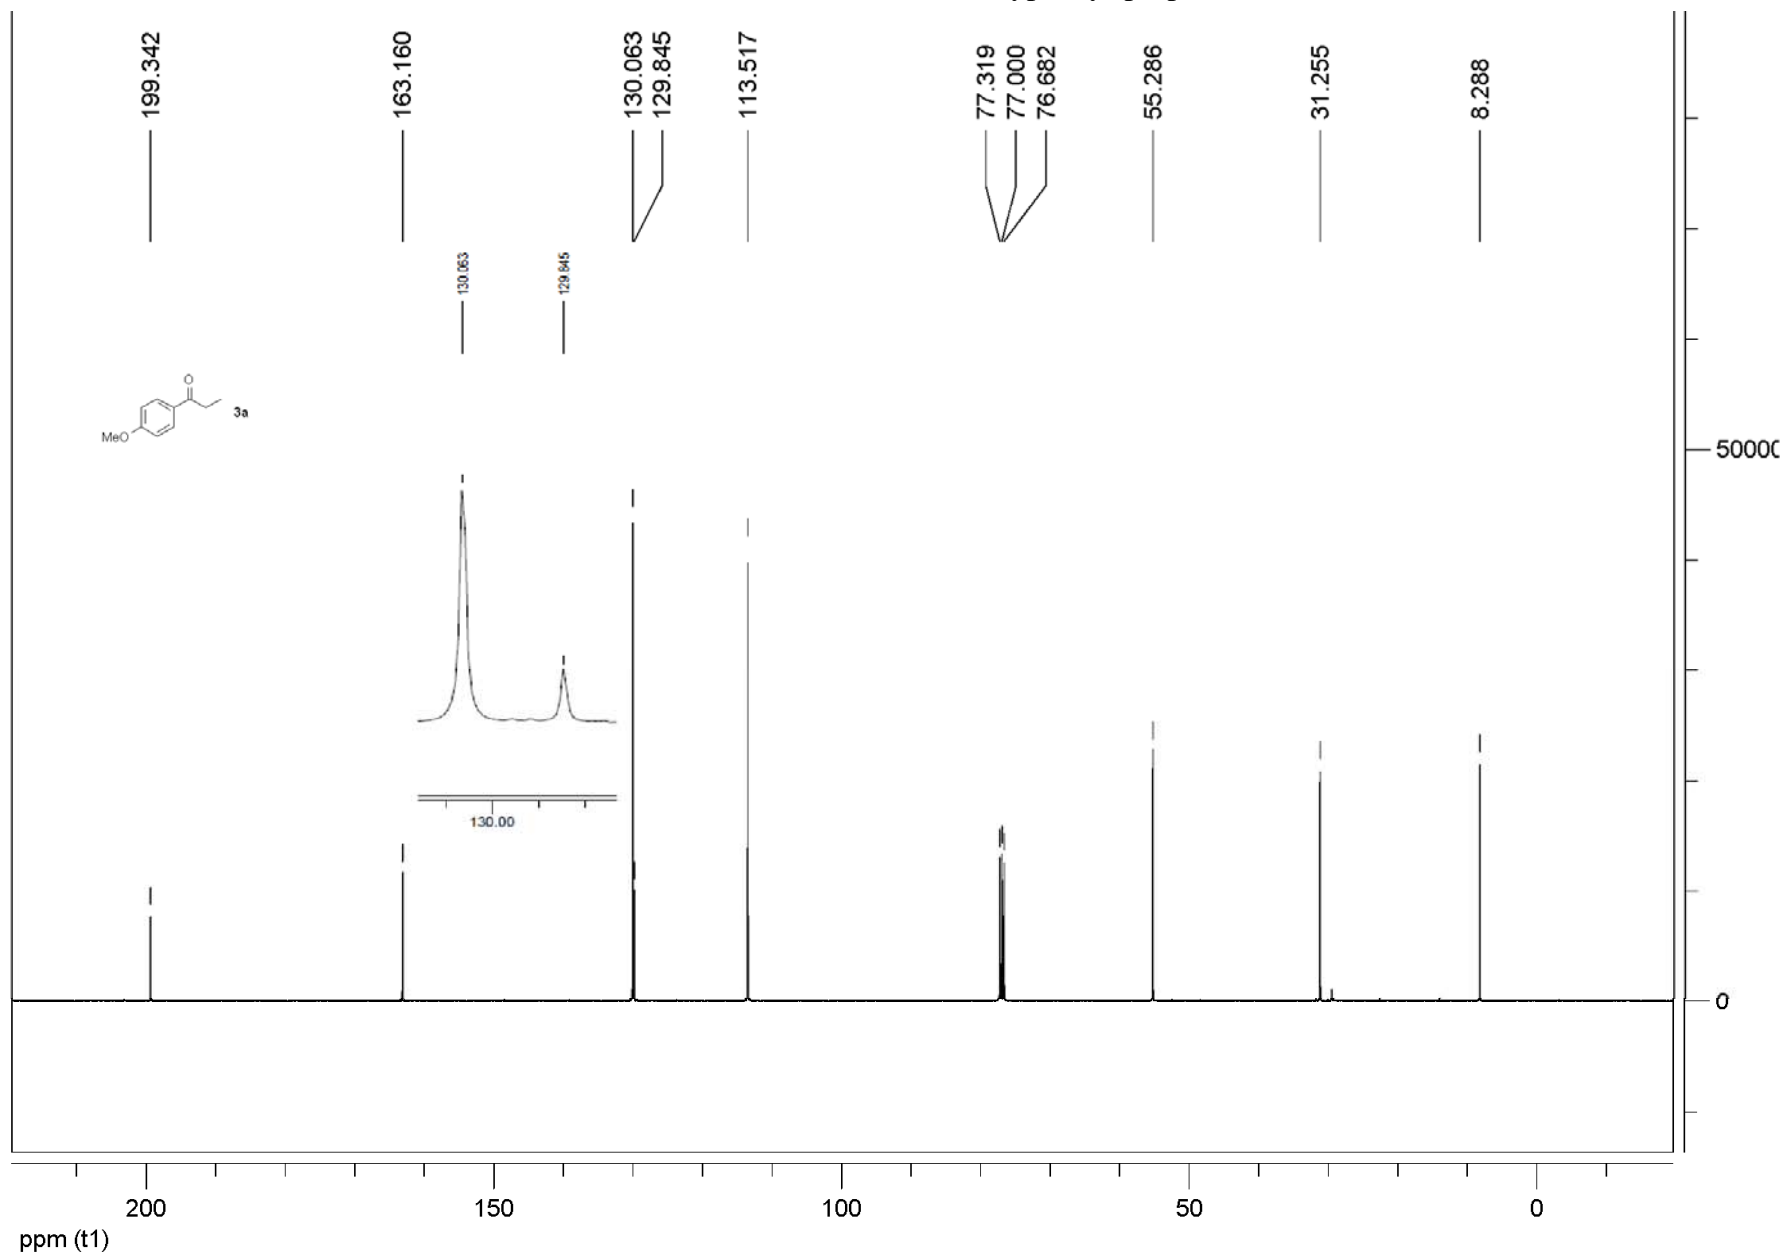

Figure S3.  $^1\text{H}$  NMR of 1-(4-acetylphenyl)propanone (**3b**)

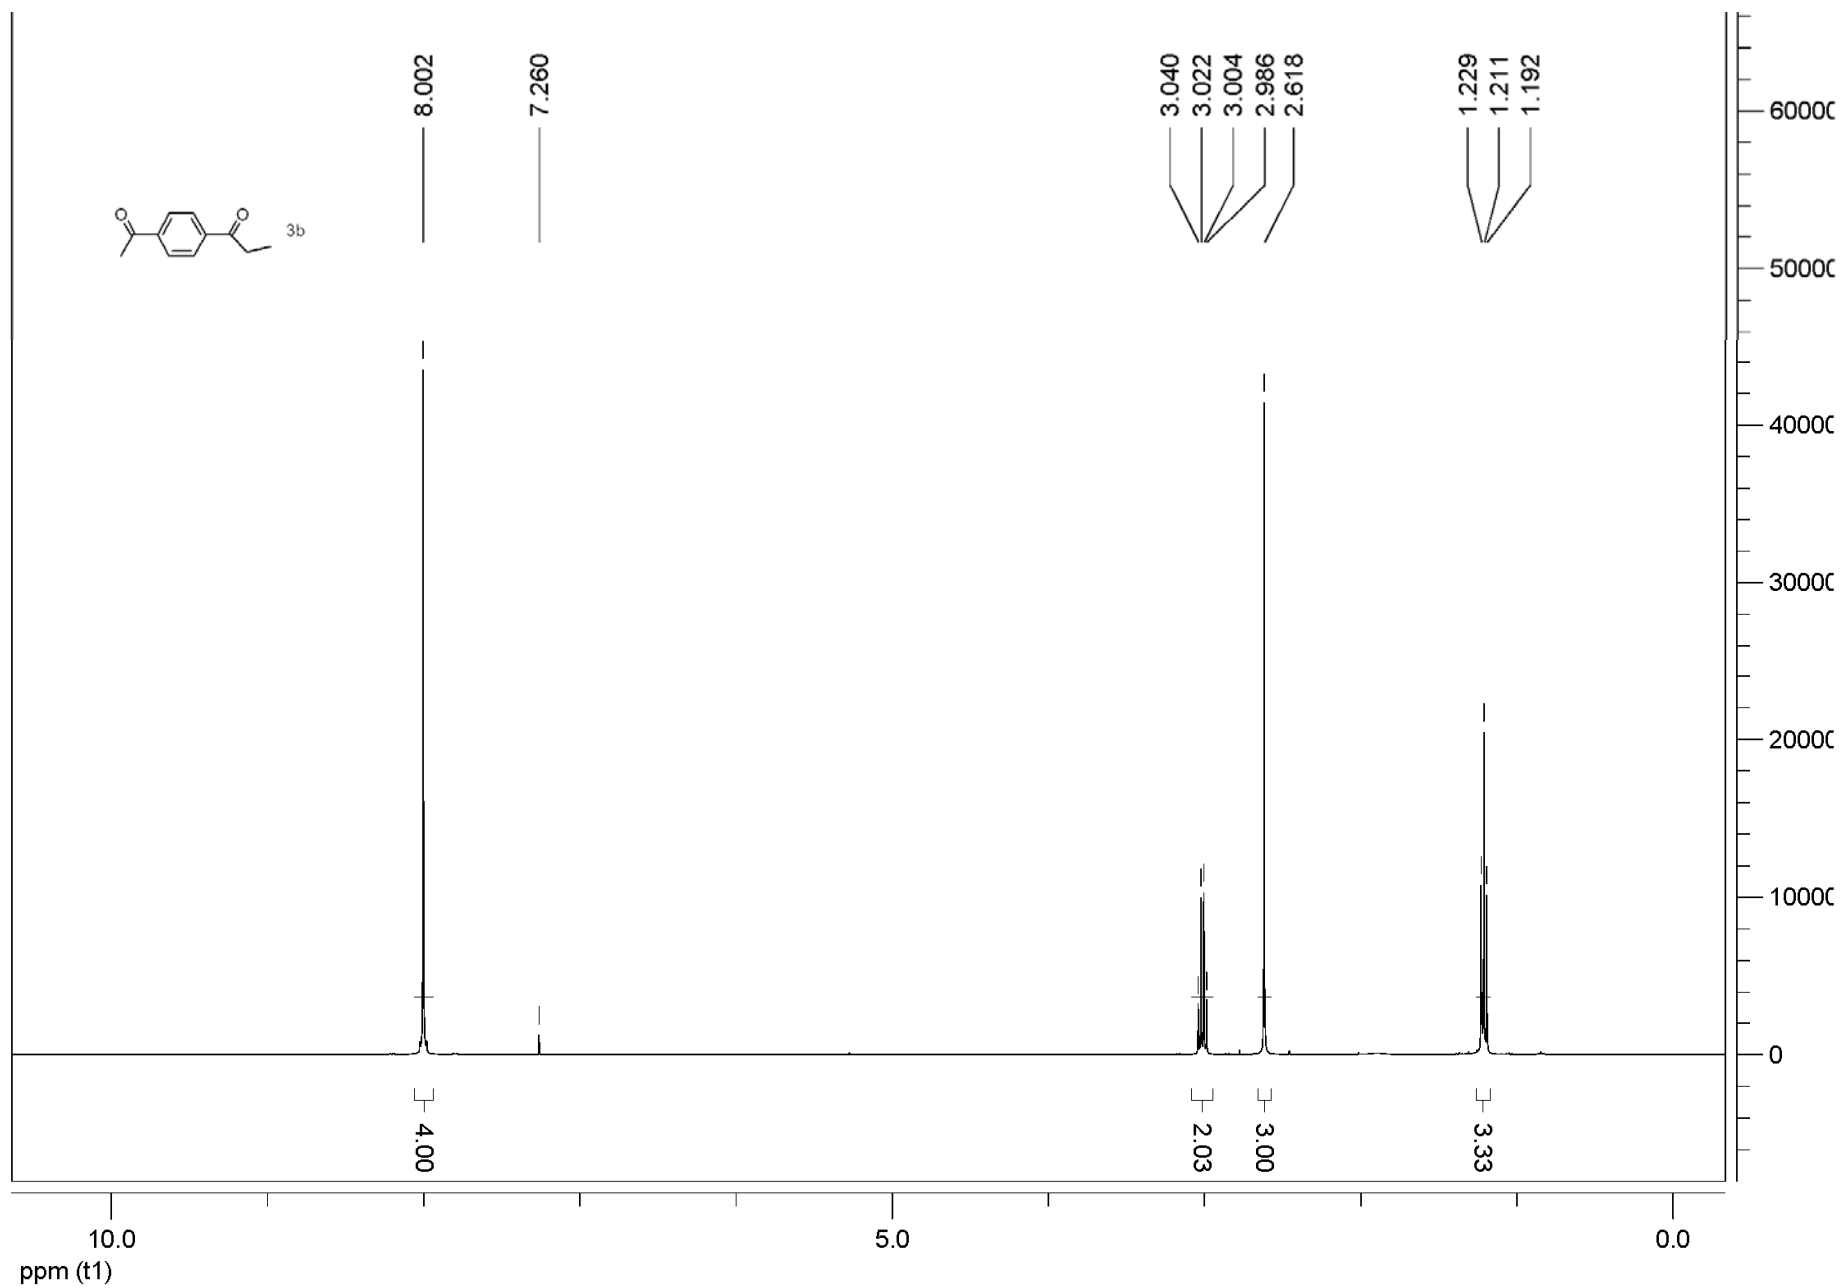

Figure S4.  $^{13}\text{C}$  NMR of 1-(4-acetylphenyl)propanone (**3b**)

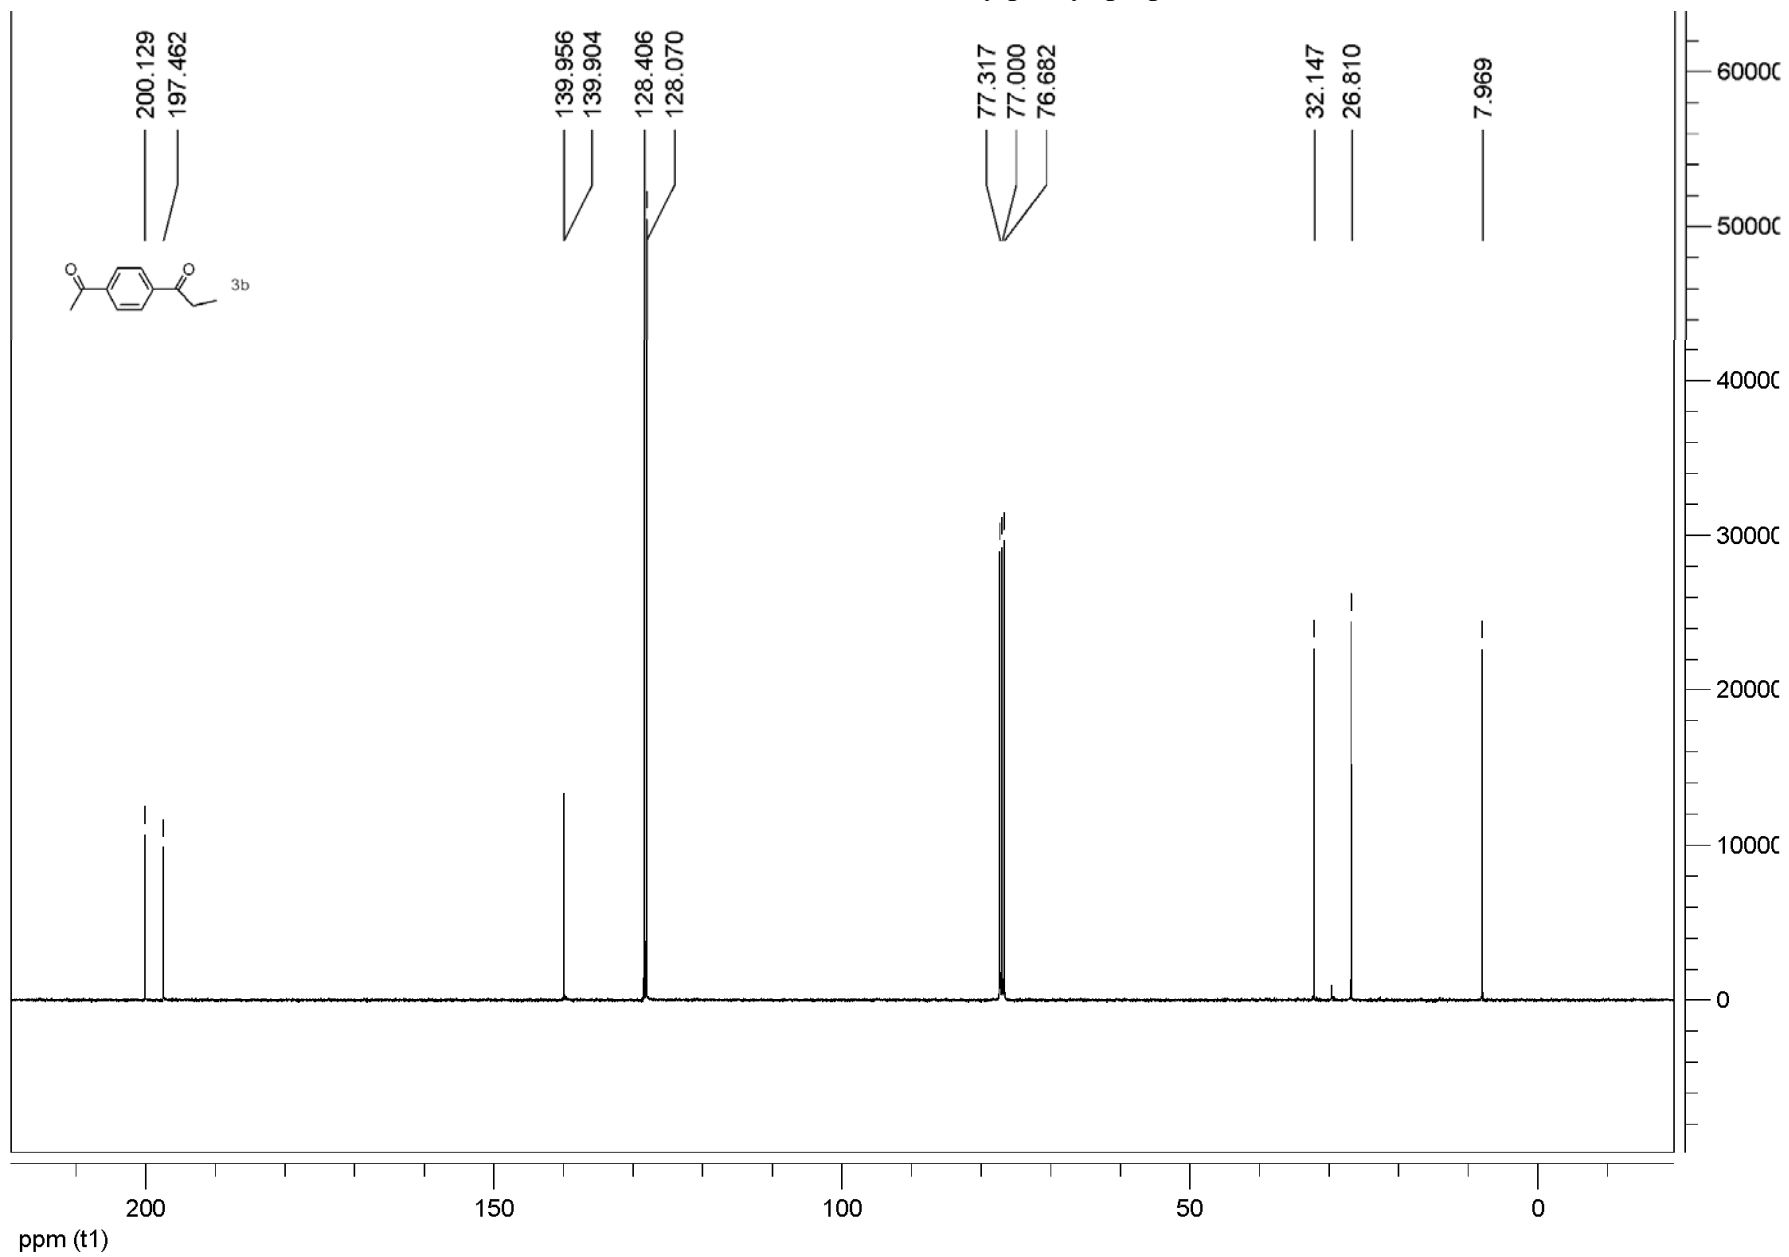

Figure S5.  $^1\text{H}$  NMR of 4-propionylbenzotrile (3c)

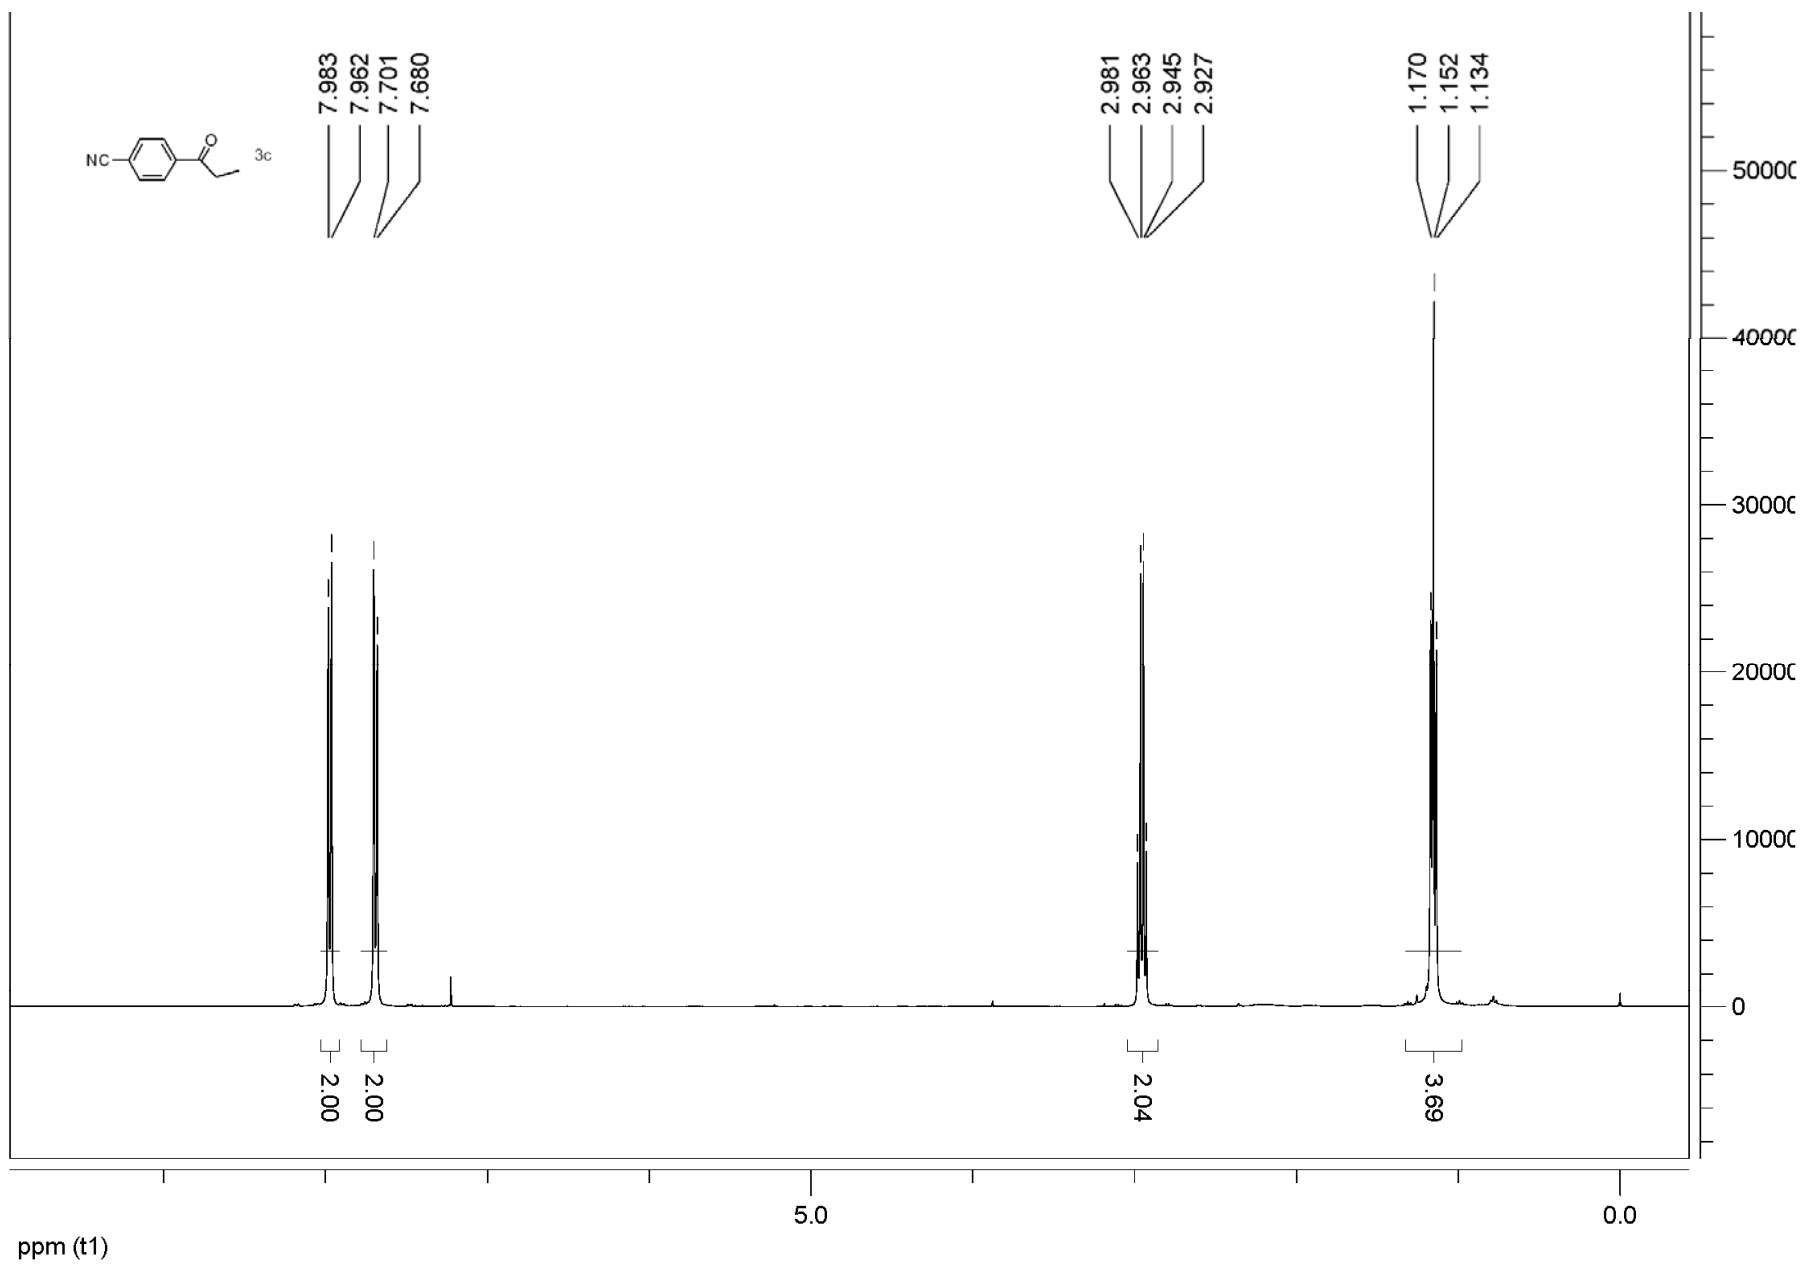

Figure S6.  $^{13}\text{C}$  NMR of 4-propionylbenzonitrile (**3c**)

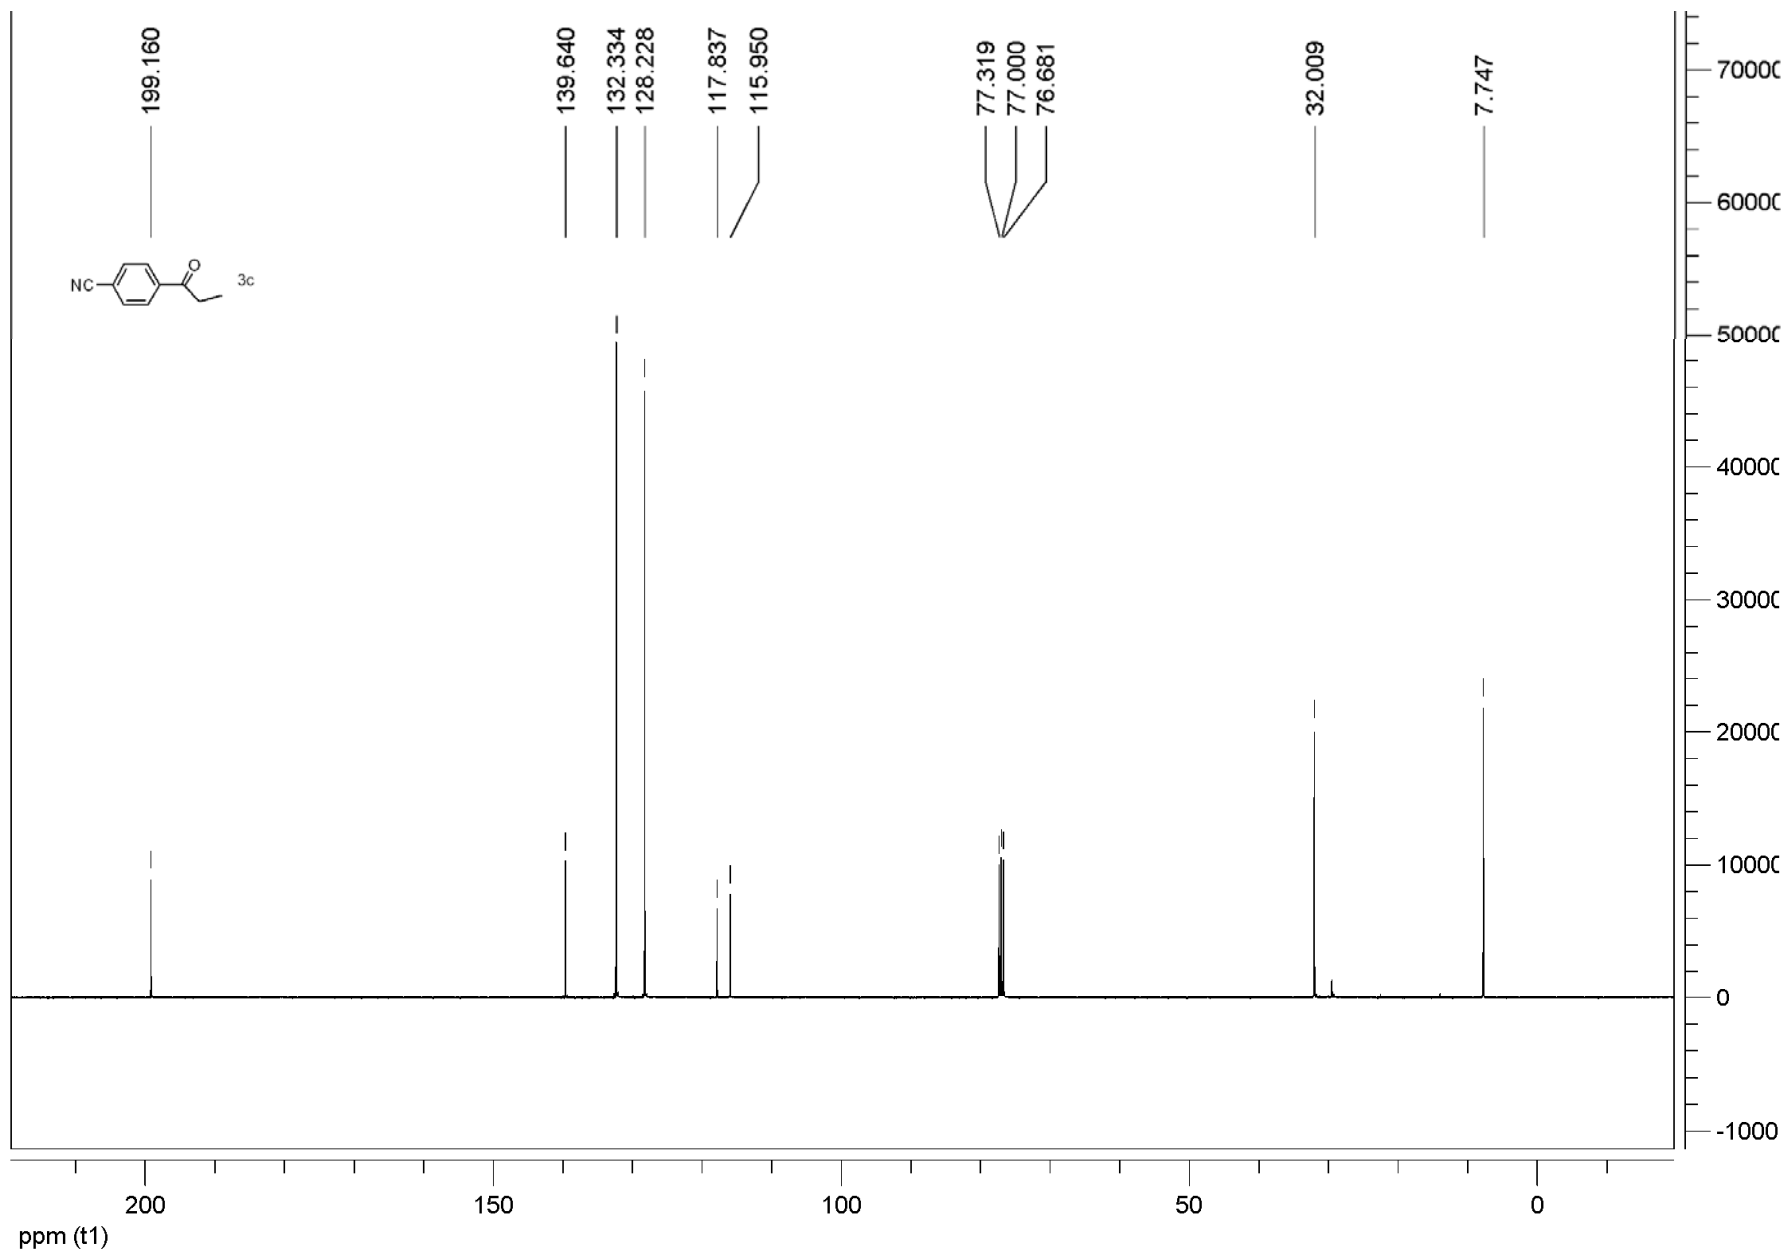

Figure S7.  $^1\text{H}$  NMR of methyl 4-propionylbenzoate (**3d**)

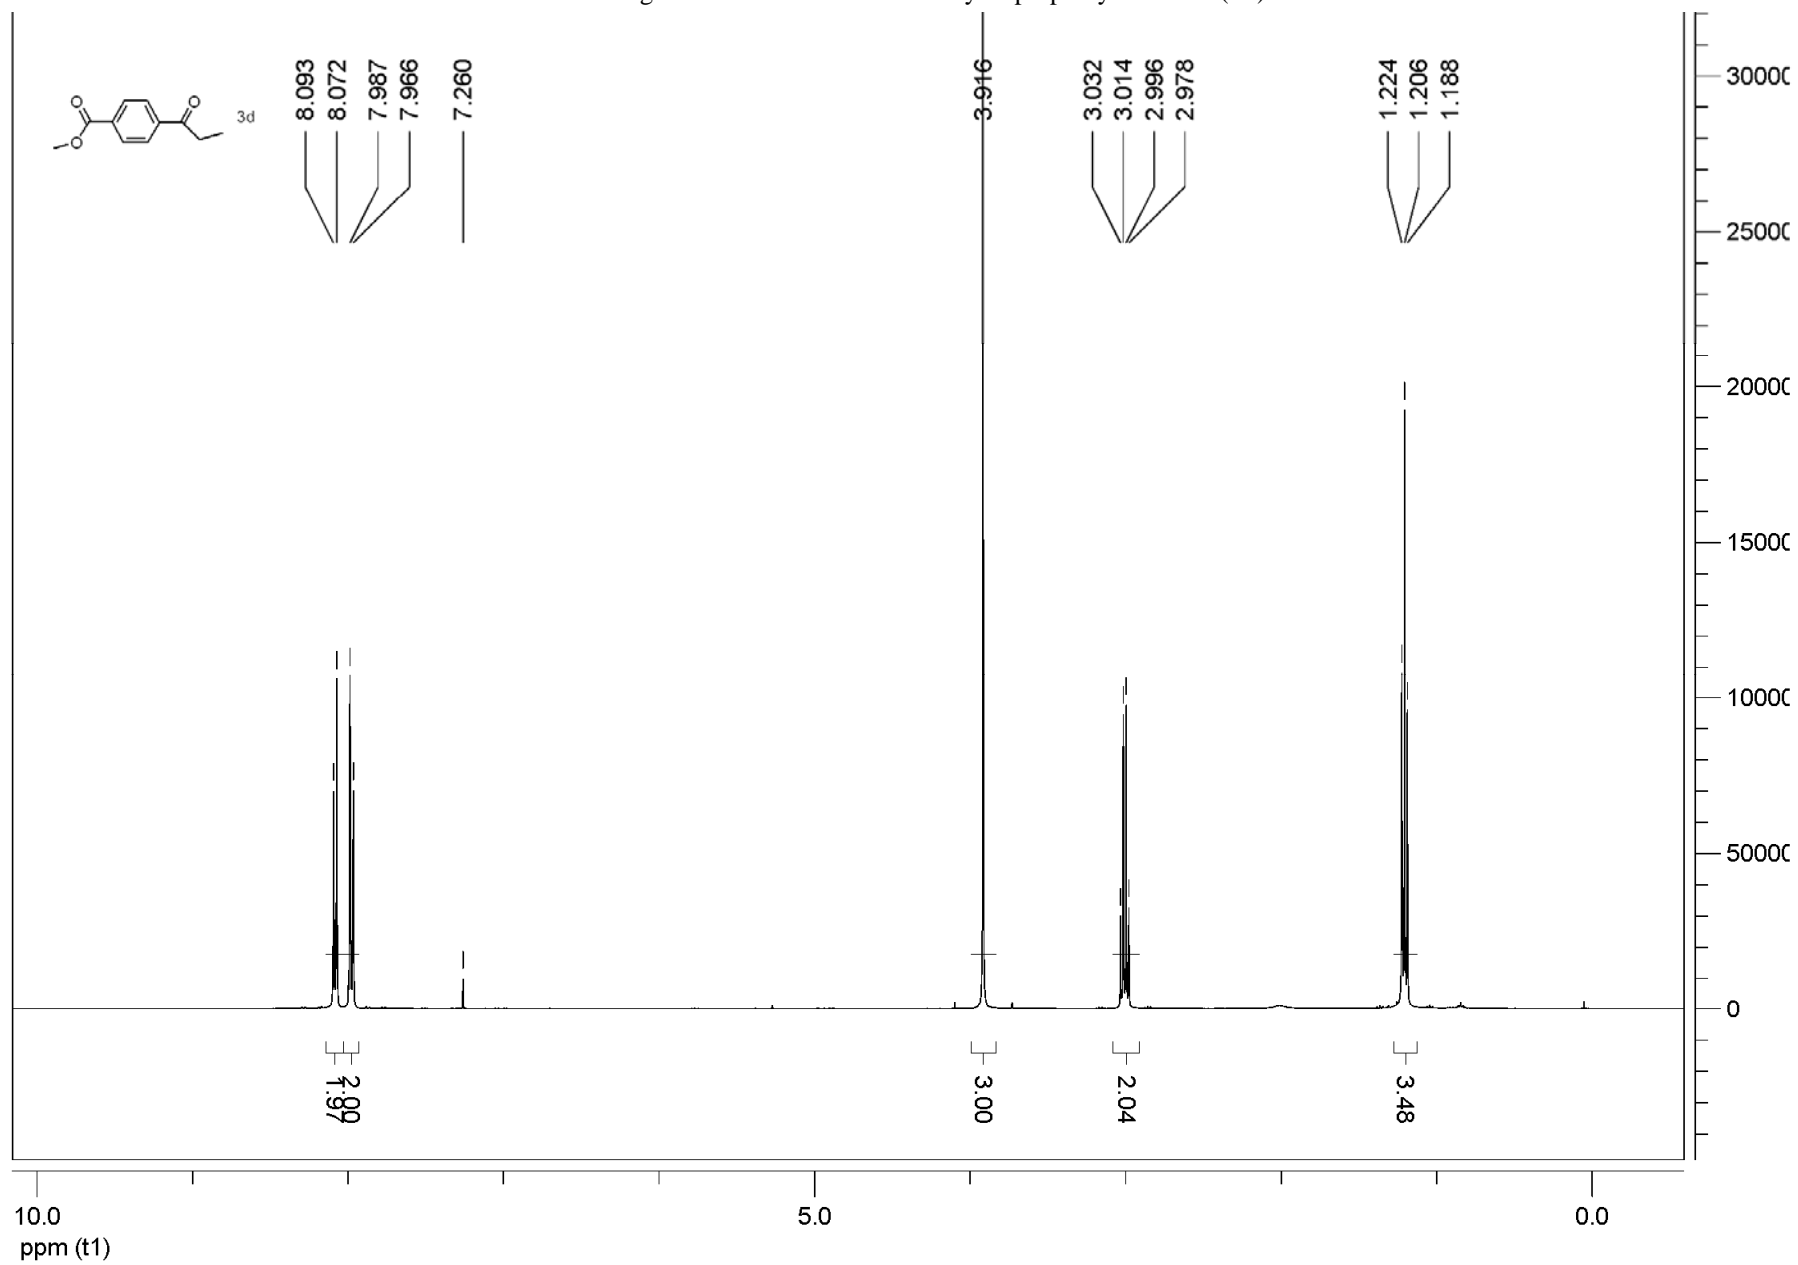



Figure S8.  $^{13}\text{C}$  NMR of methyl 4-propionylbenzoate (**3d**)

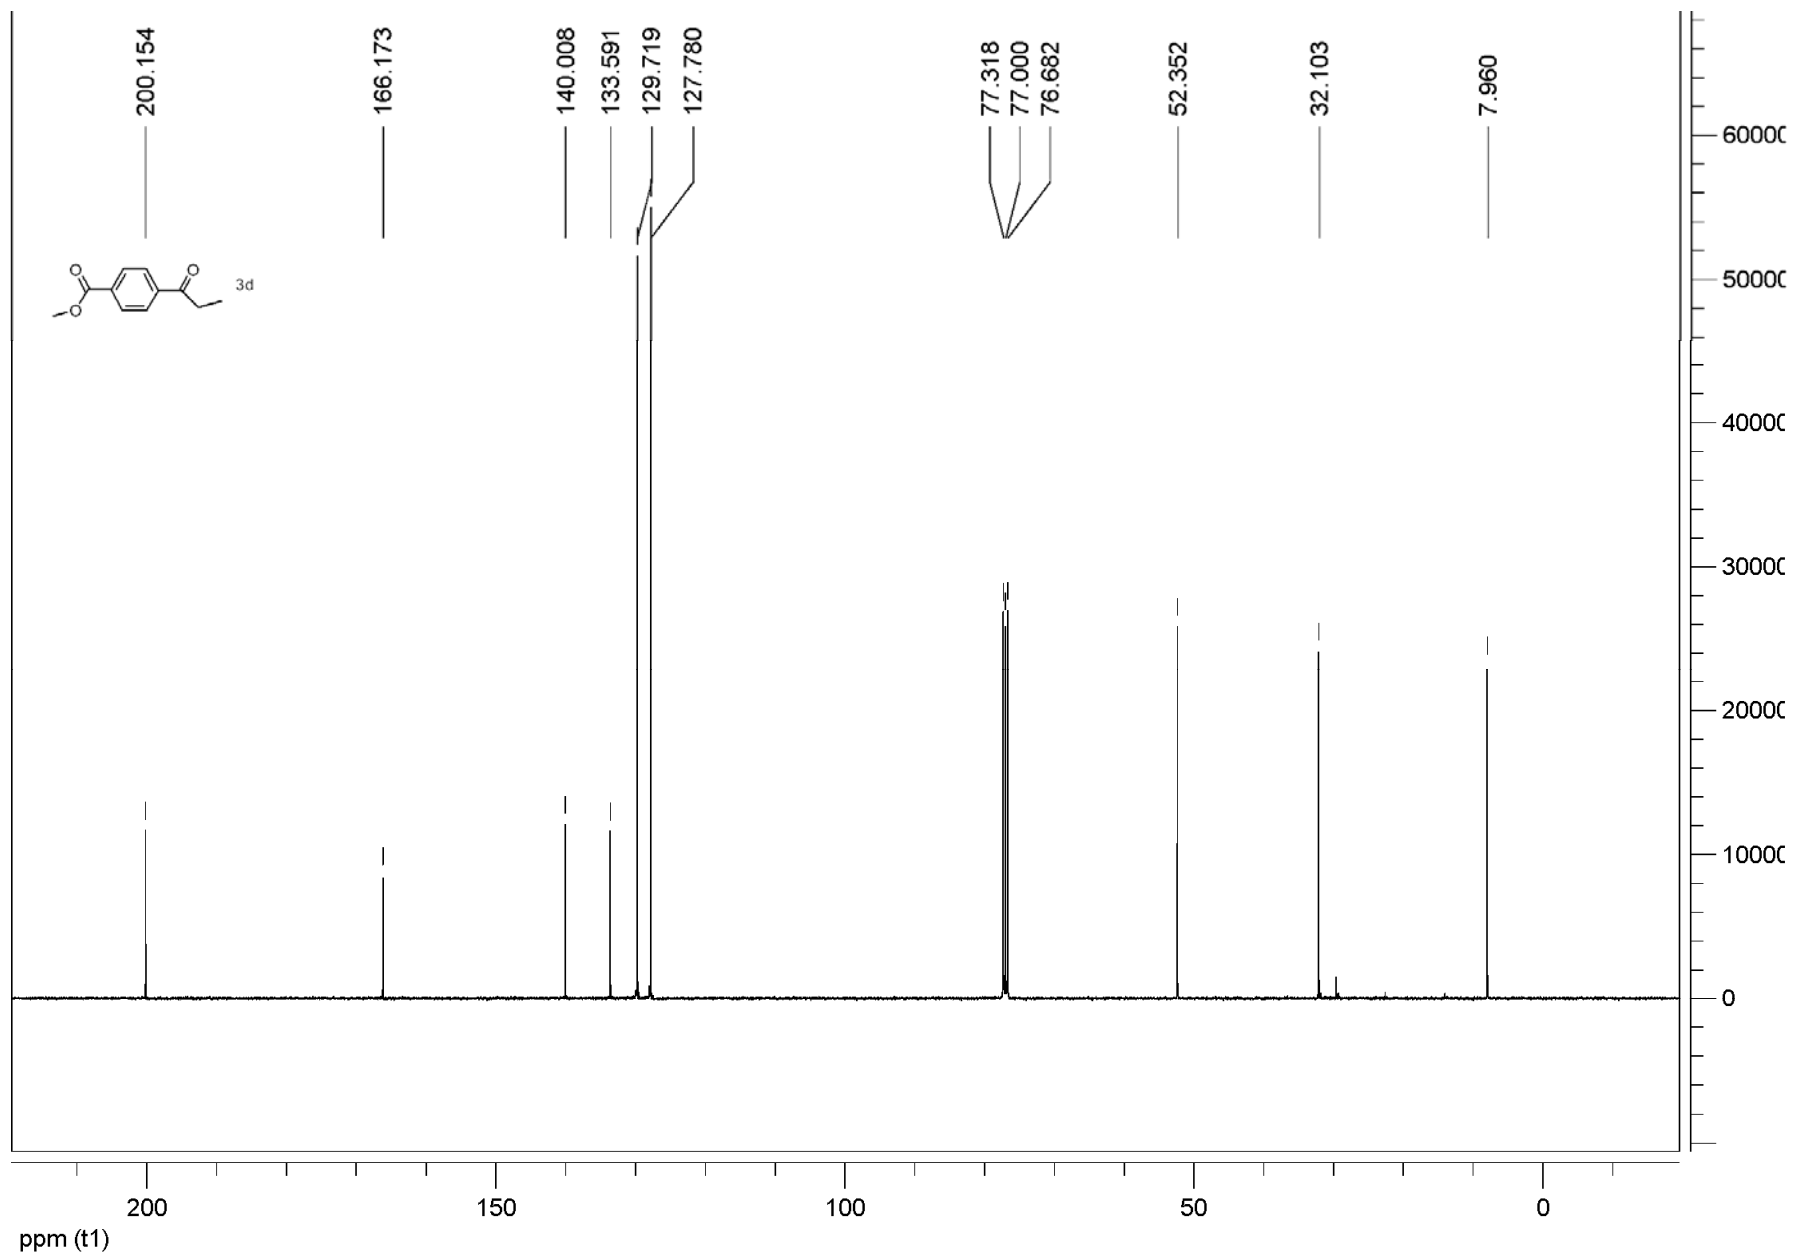

Figure S9.  $^1\text{H}$  NMR of 1-(4-ethylphenyl)propanone (**3e**)

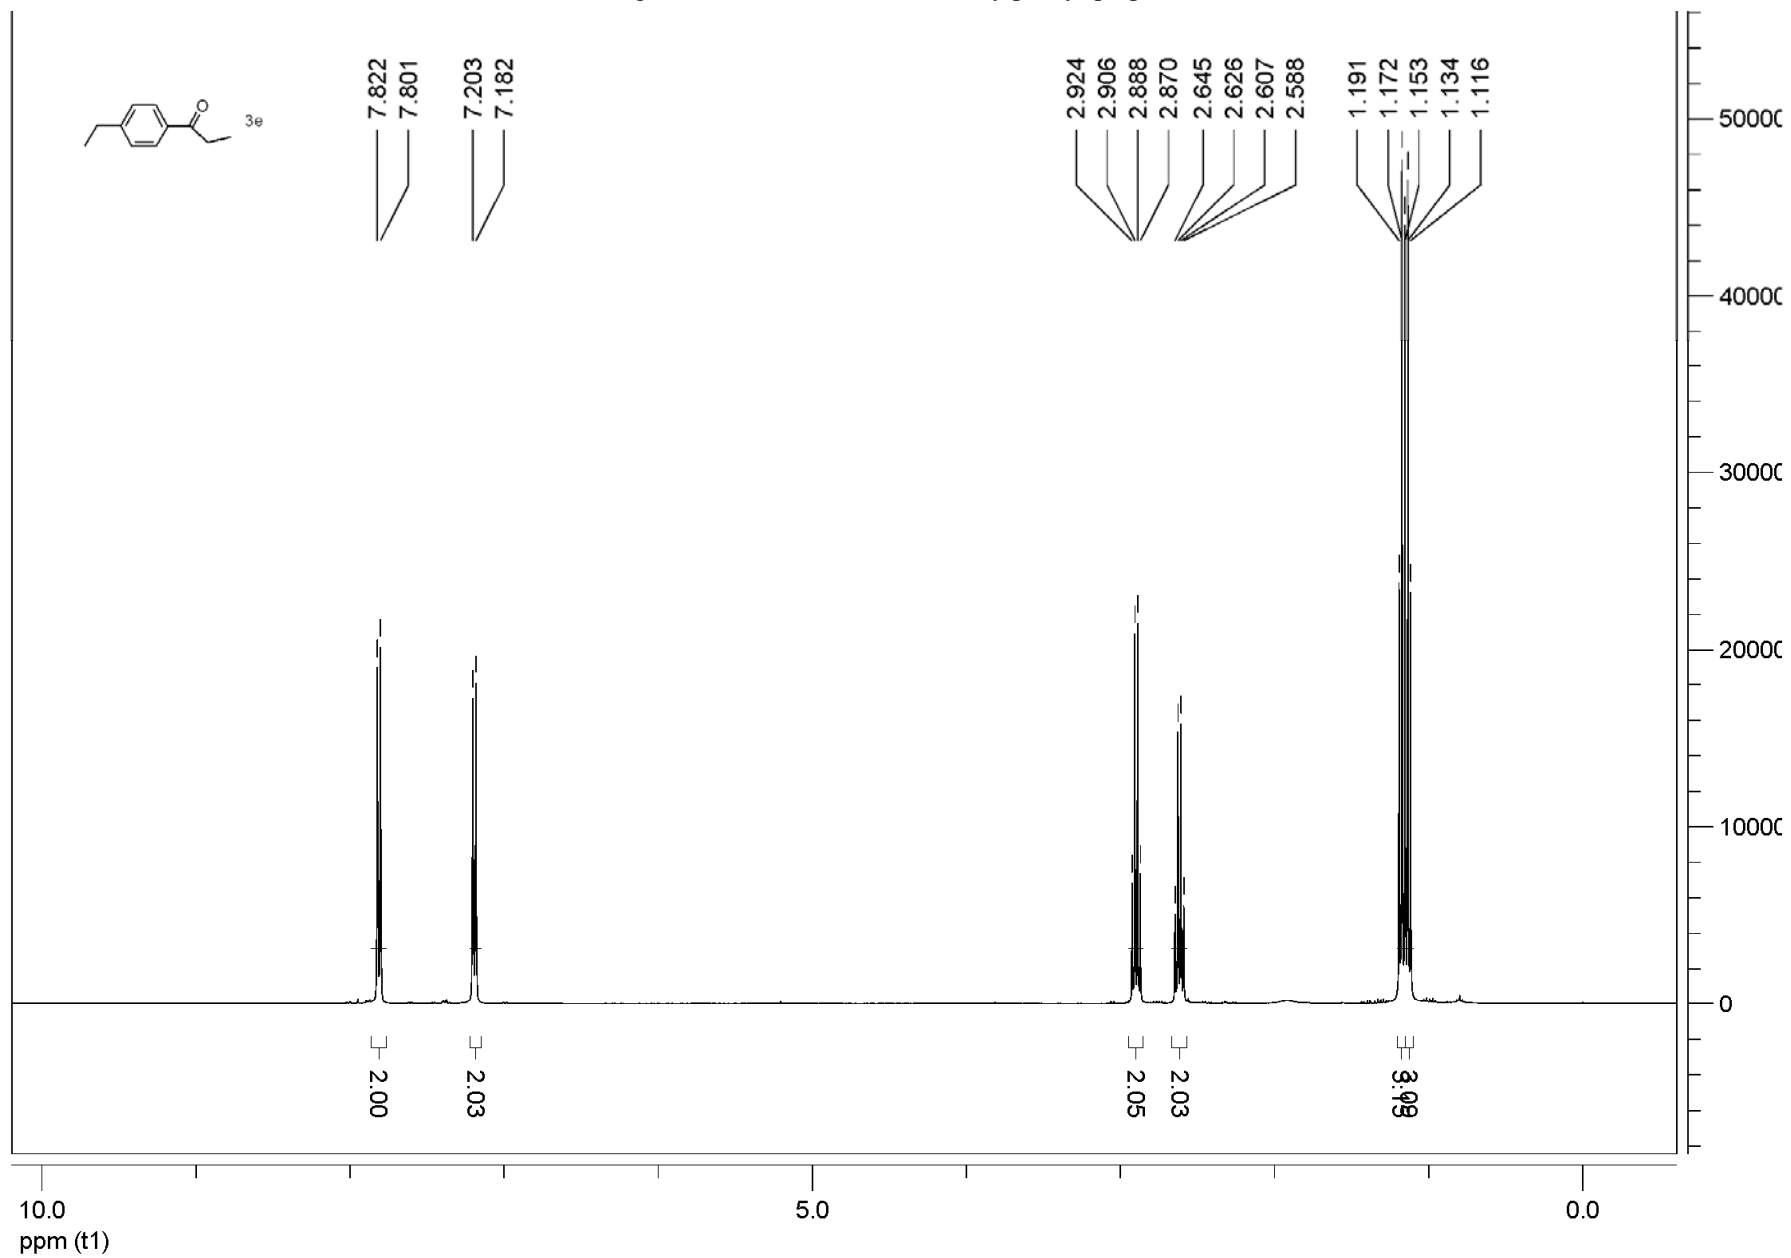

Figure S10.  $^{13}\text{C}$  NMR of 1-(4-ethylphenyl)propanone (**3e**)

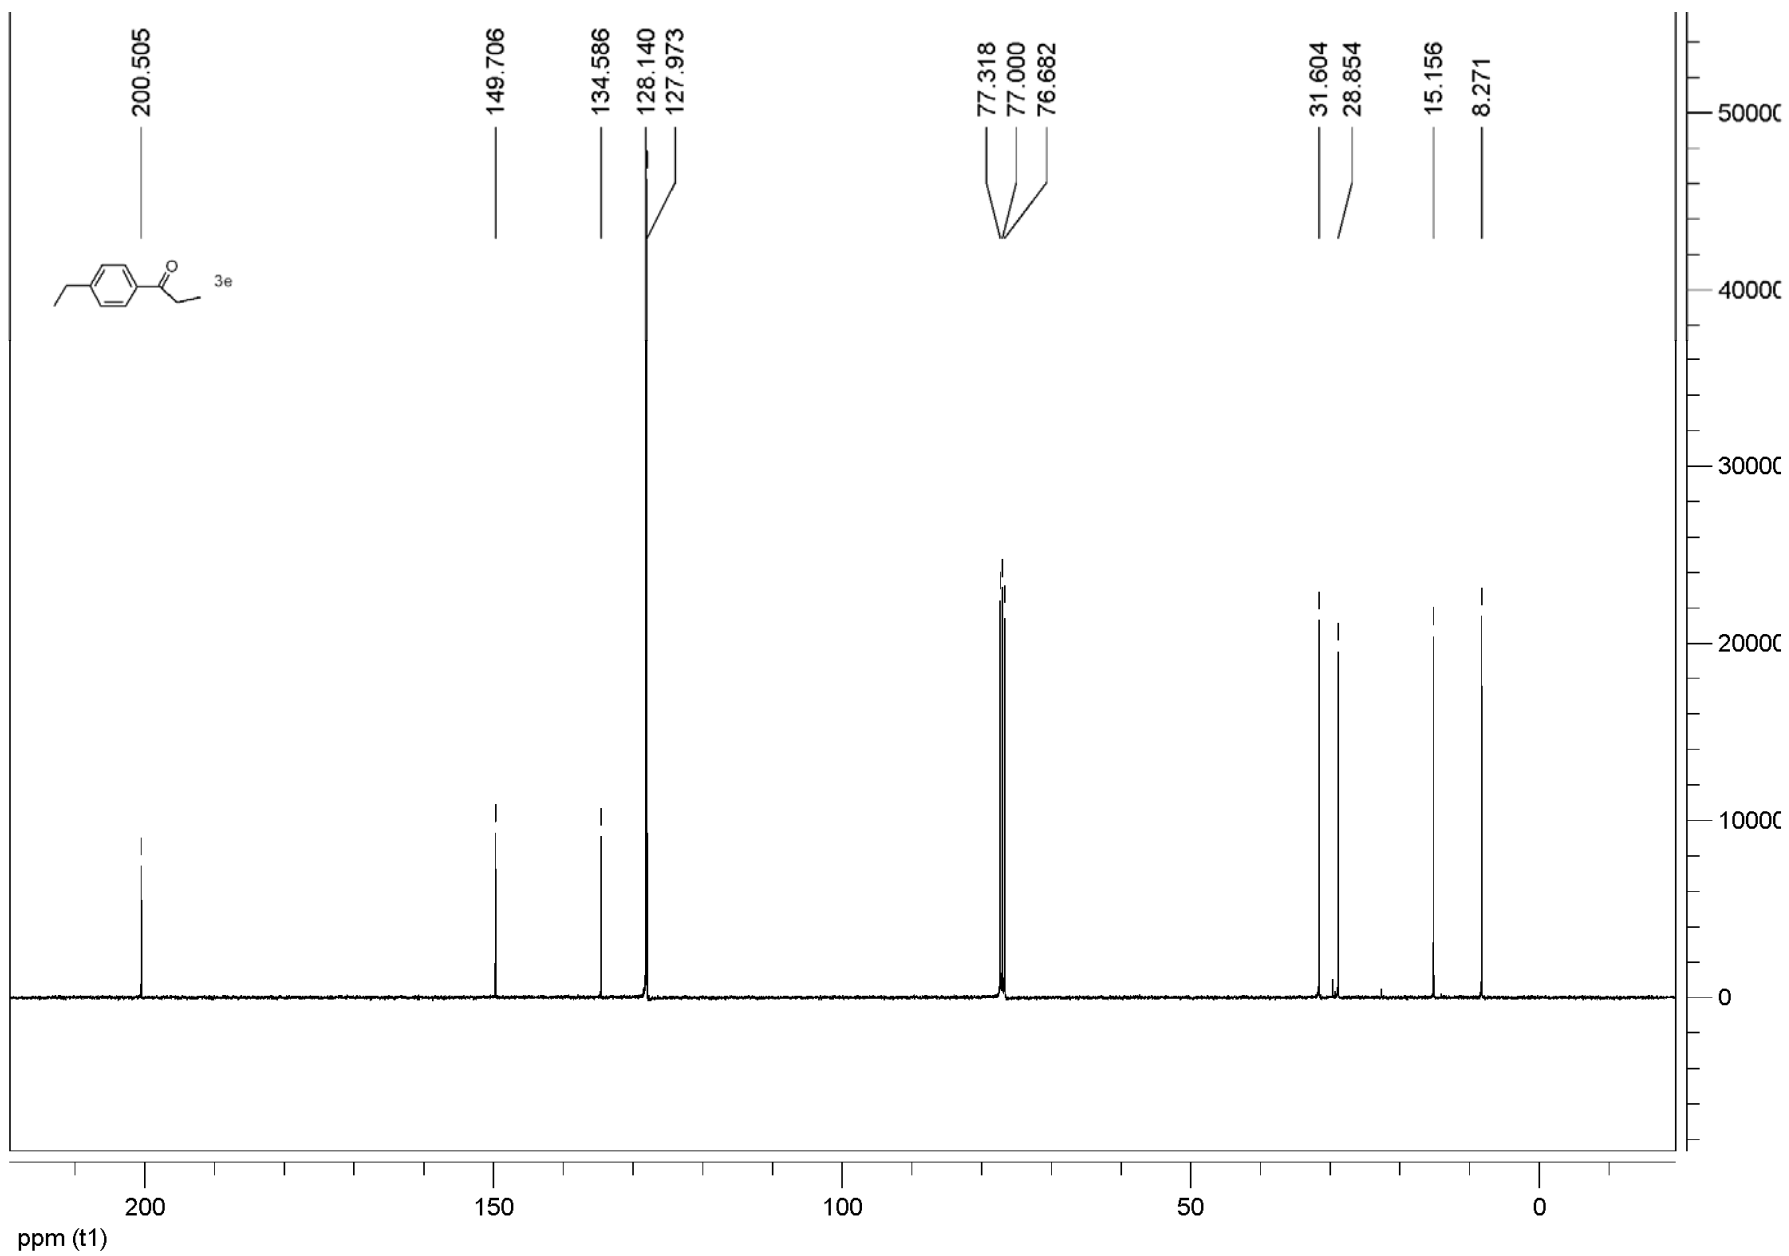

Figure S11.  $^1\text{H}$  NMR of 1-(o-tolyl)propanone (**3f**)

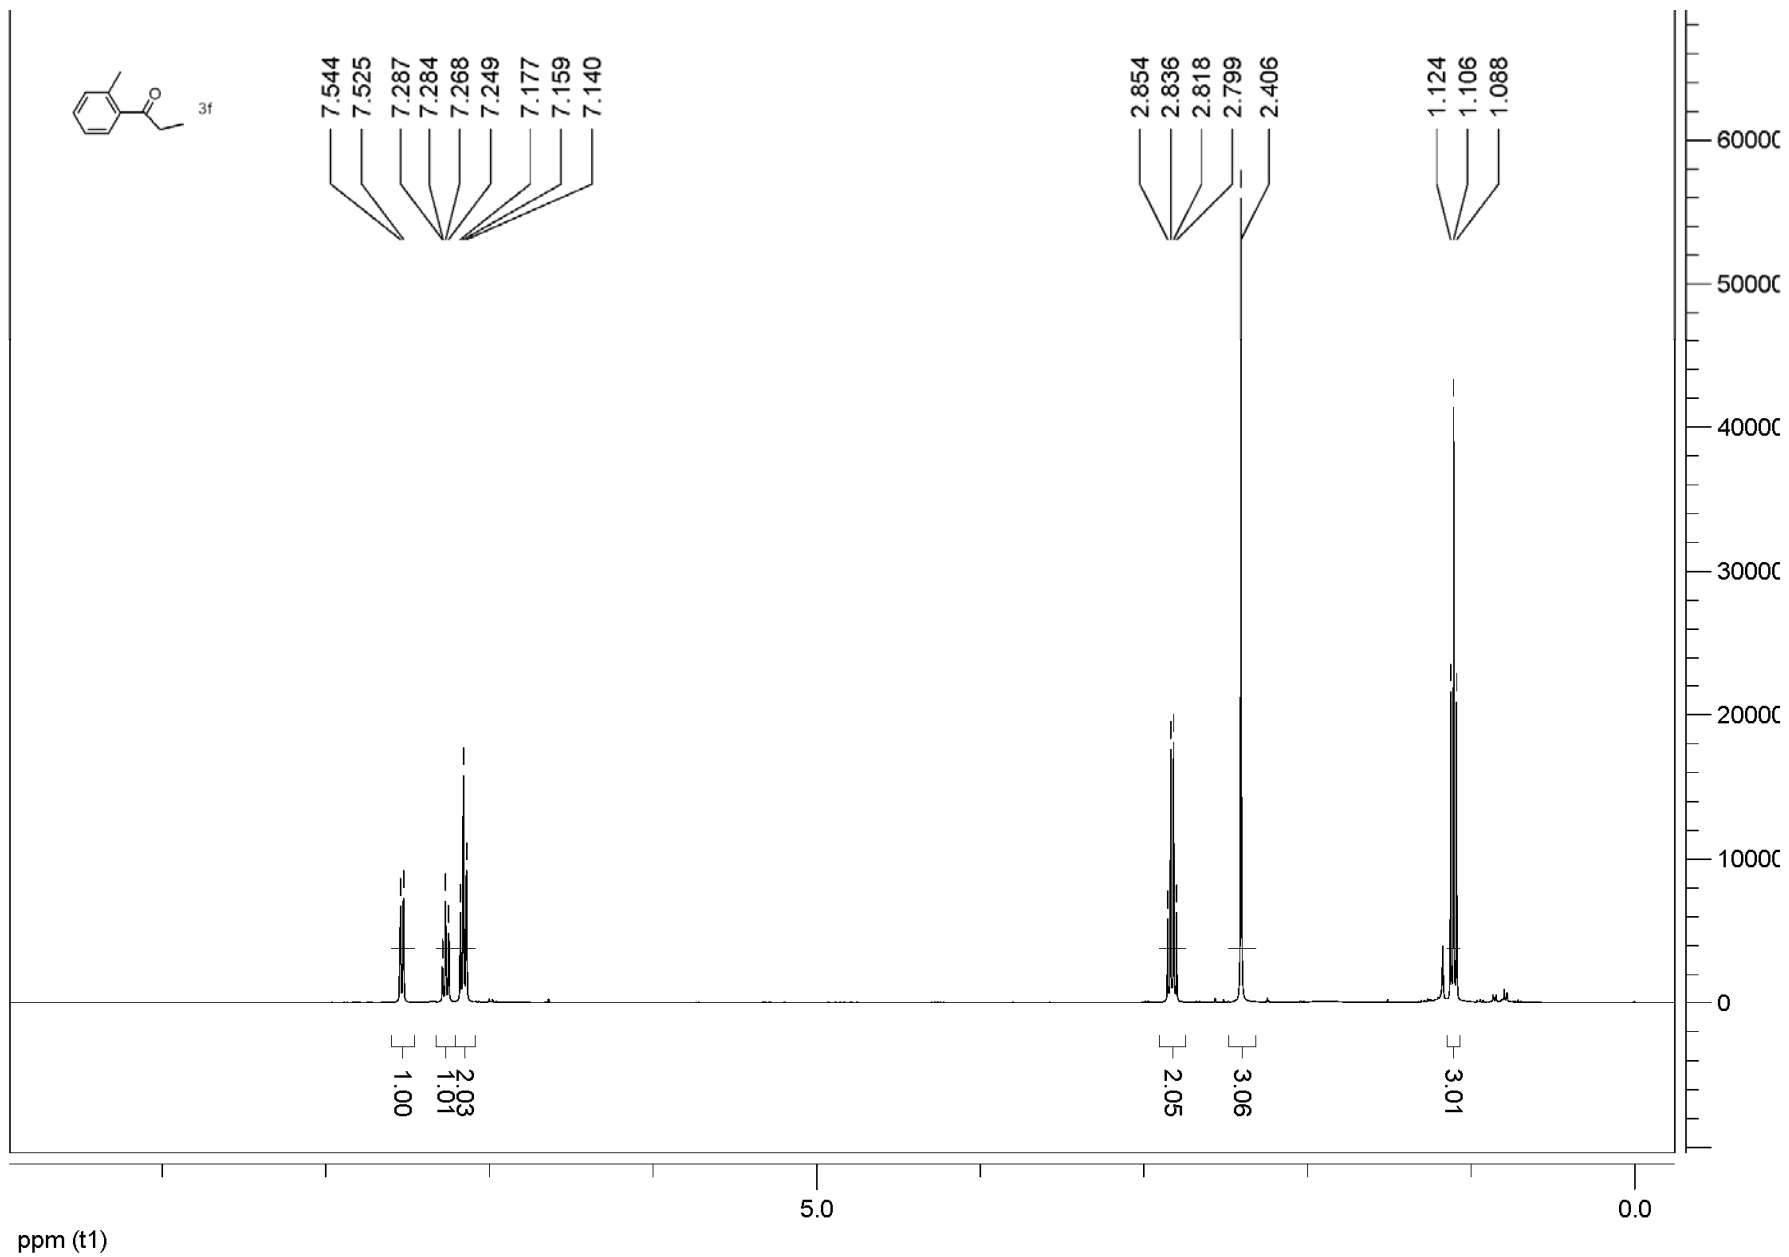

Figure S12.  $^{13}\text{C}$  NMR of 1-(o-tolyl)propanone (**3f**)

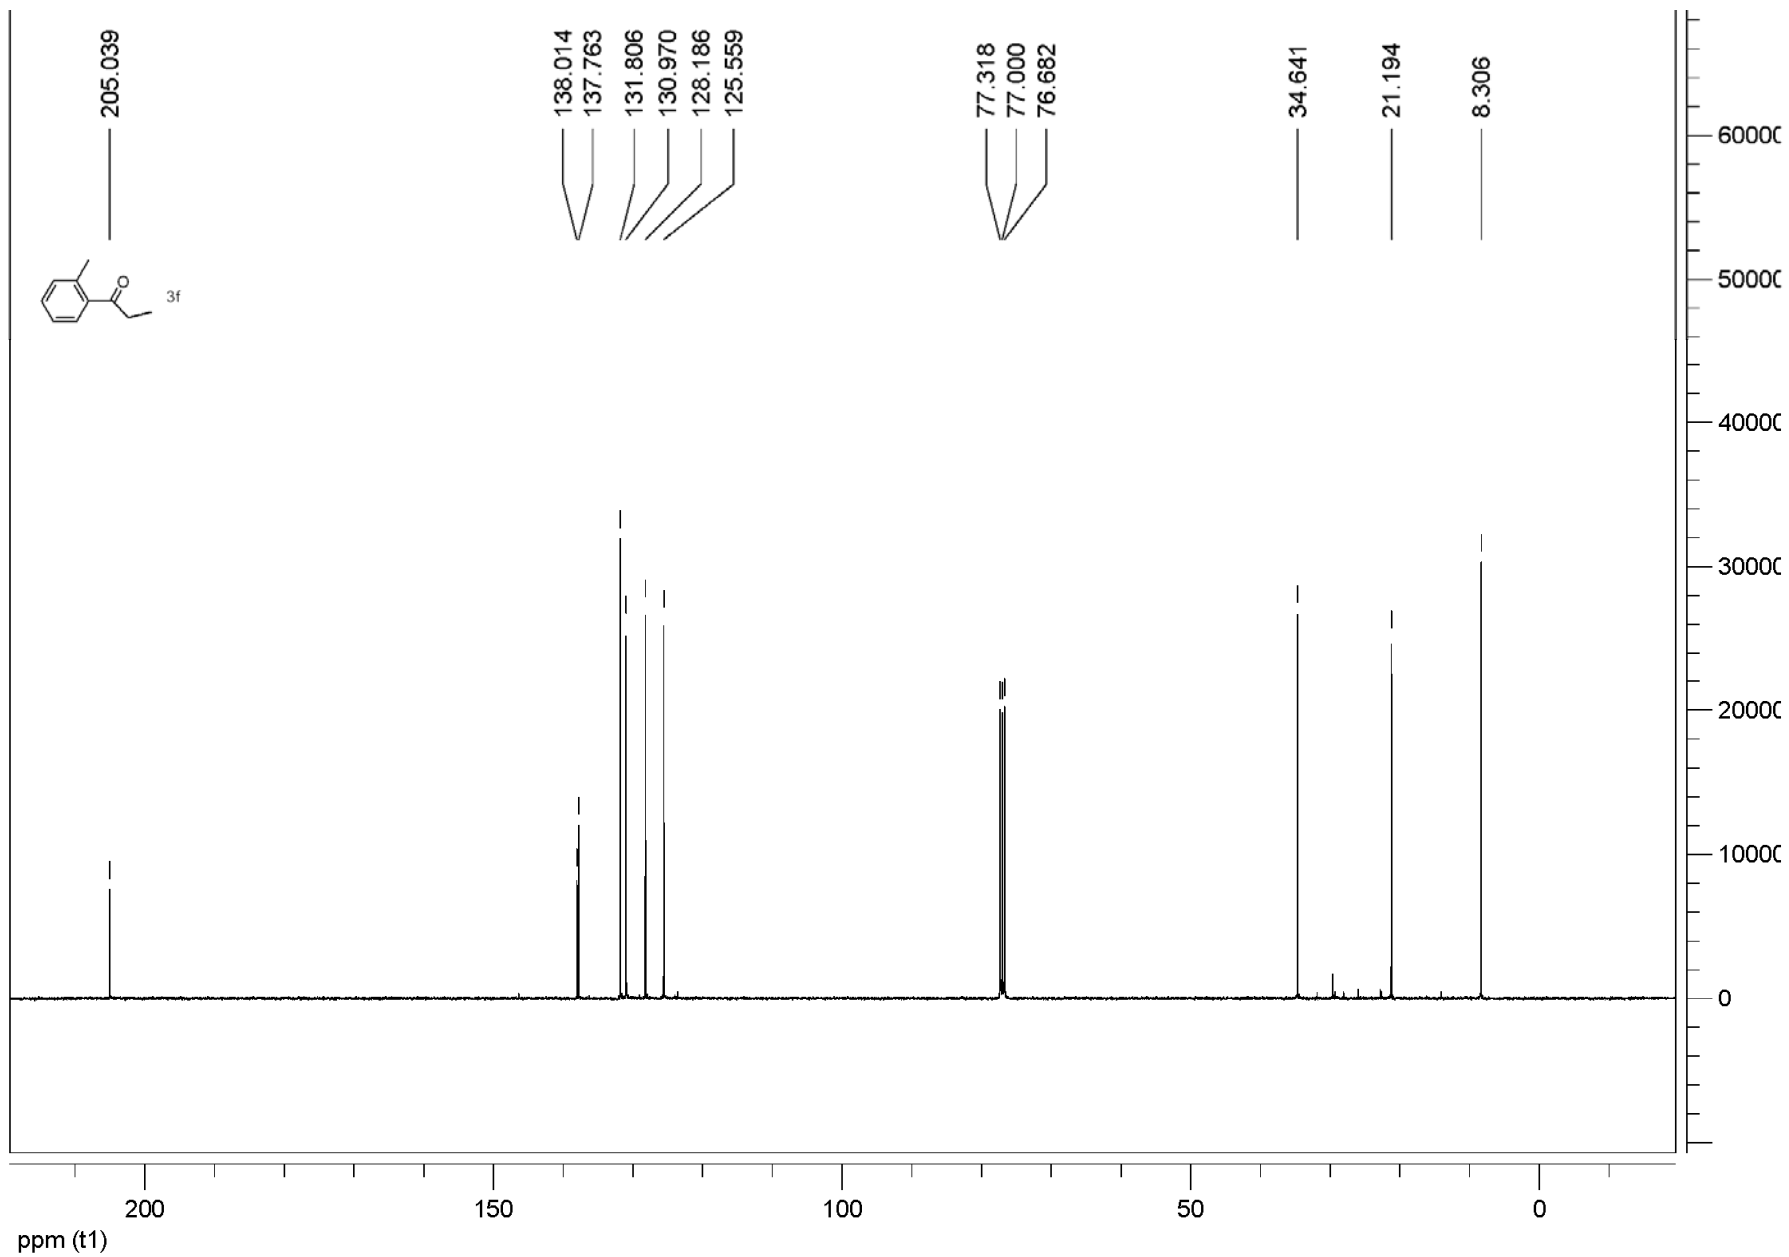

Figure S13.  $^1\text{H}$  NMR of 1-phenylpentan-3-one (**3g**)

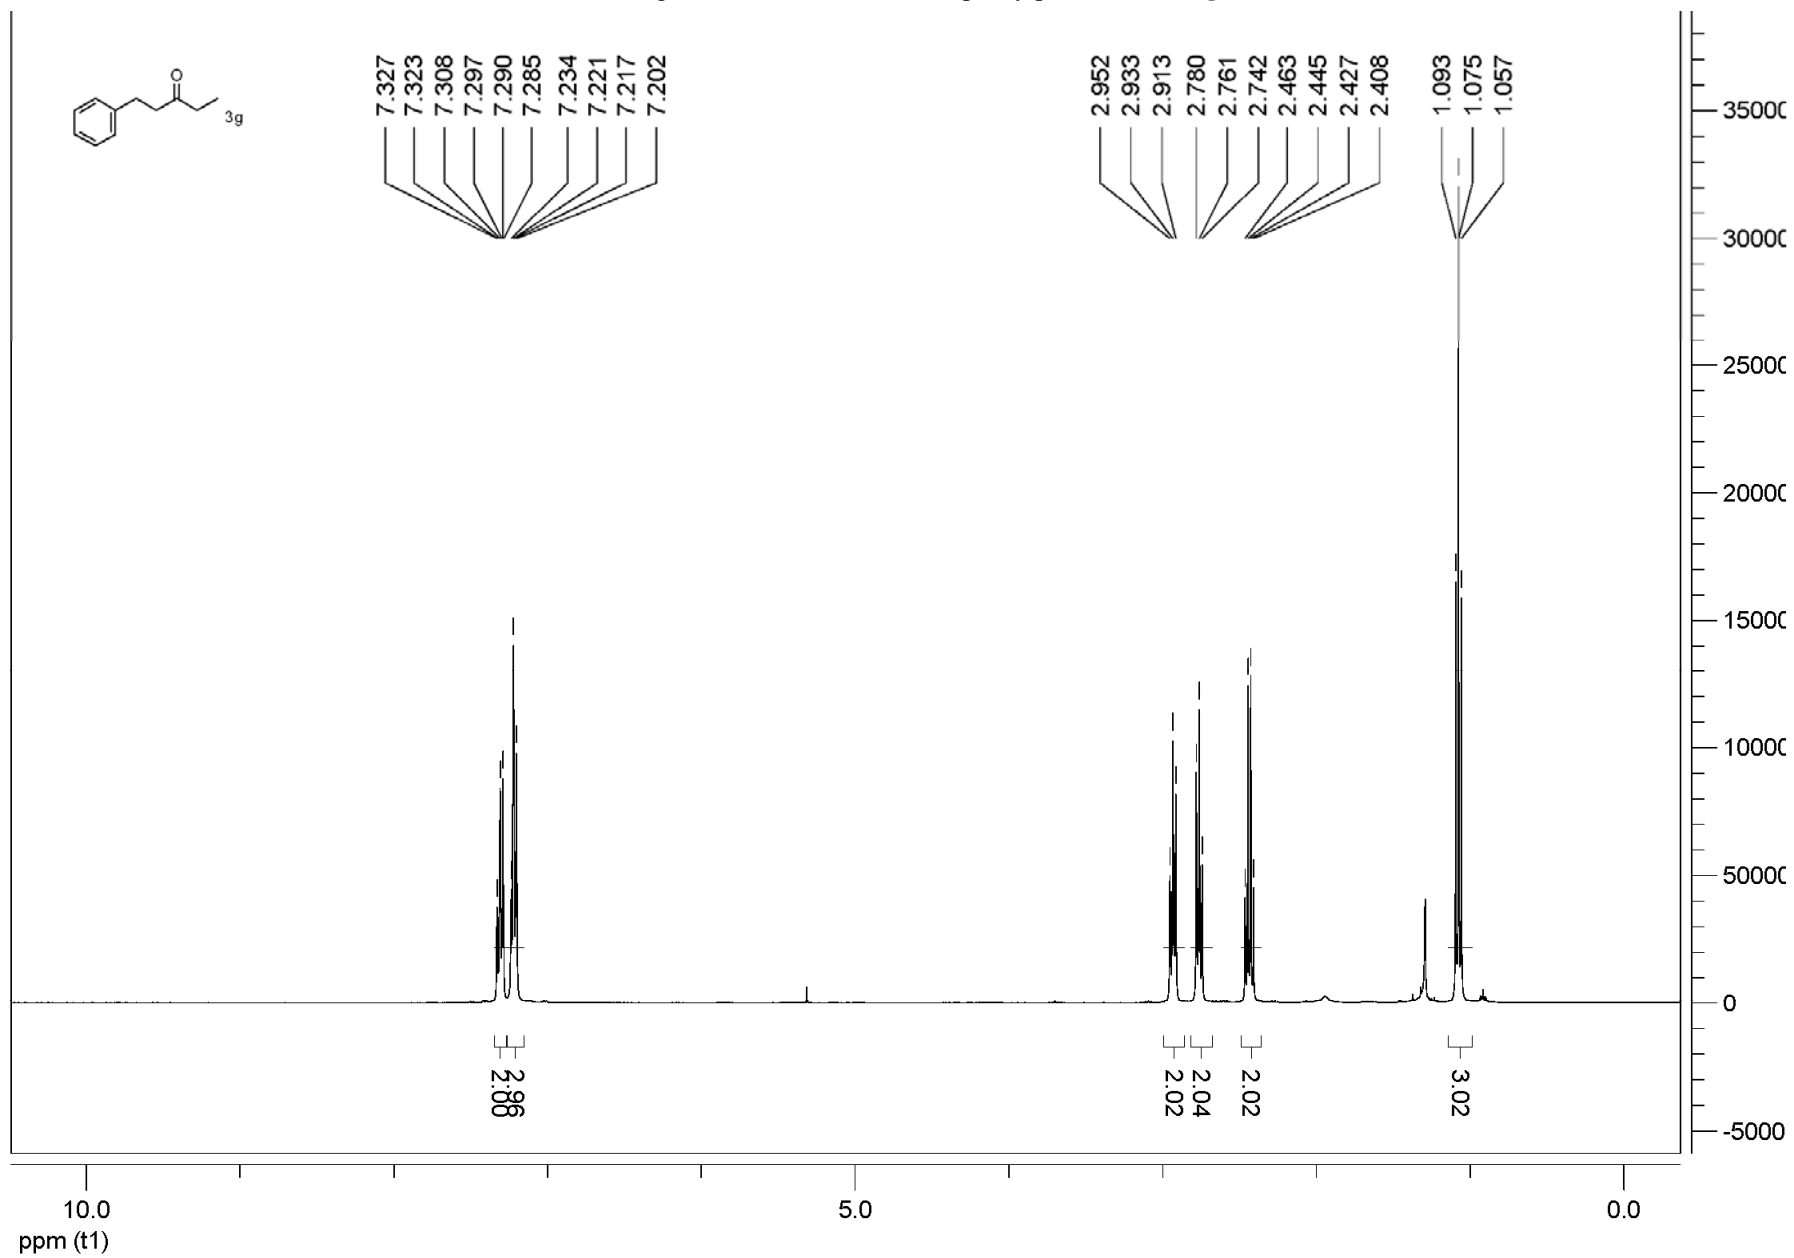

Figure S14.  $^{13}\text{C}$  NMR of 1-phenylpentan-3-one (**3g**)

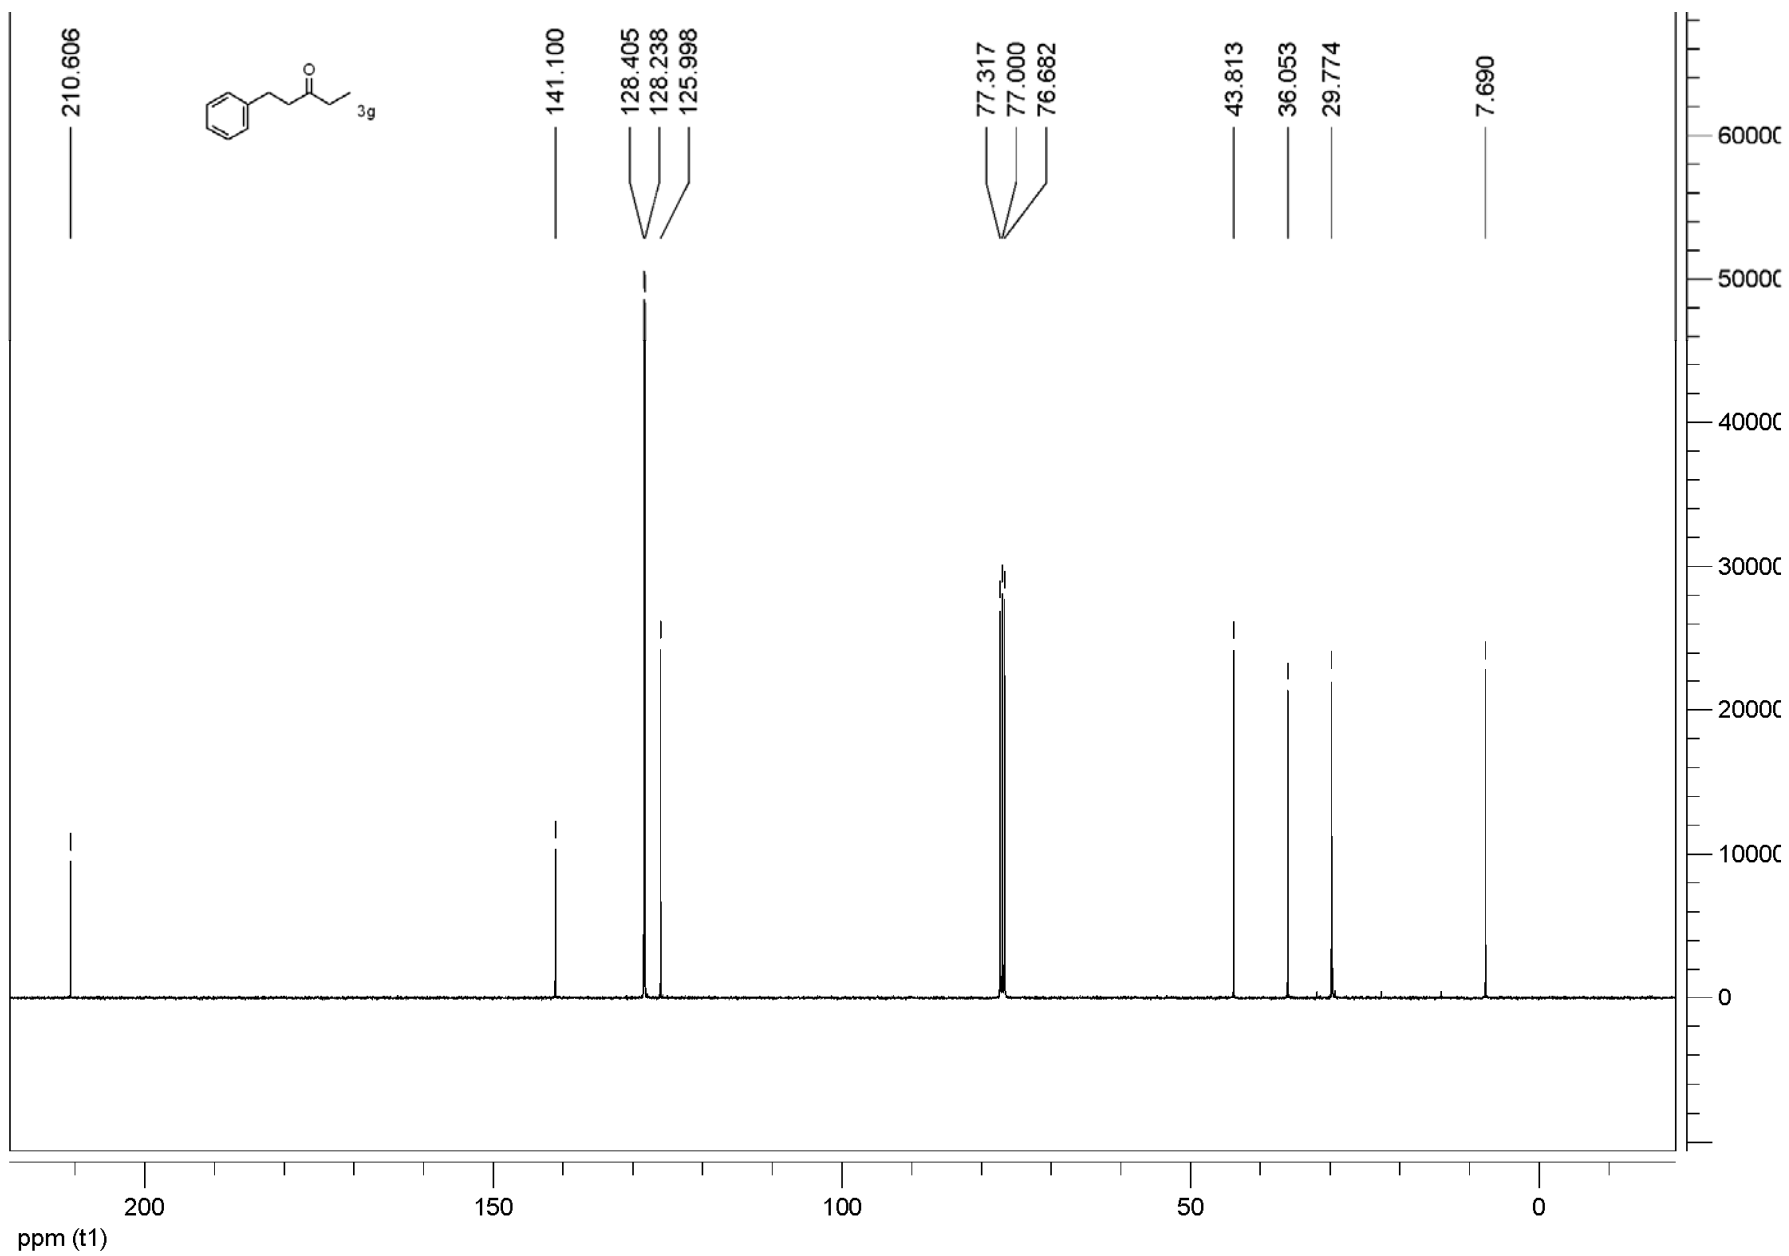

Figure S15.  $^1\text{H}$  NMR of 1-(4-methoxyphenyl)pentan-3-one (**3h**)

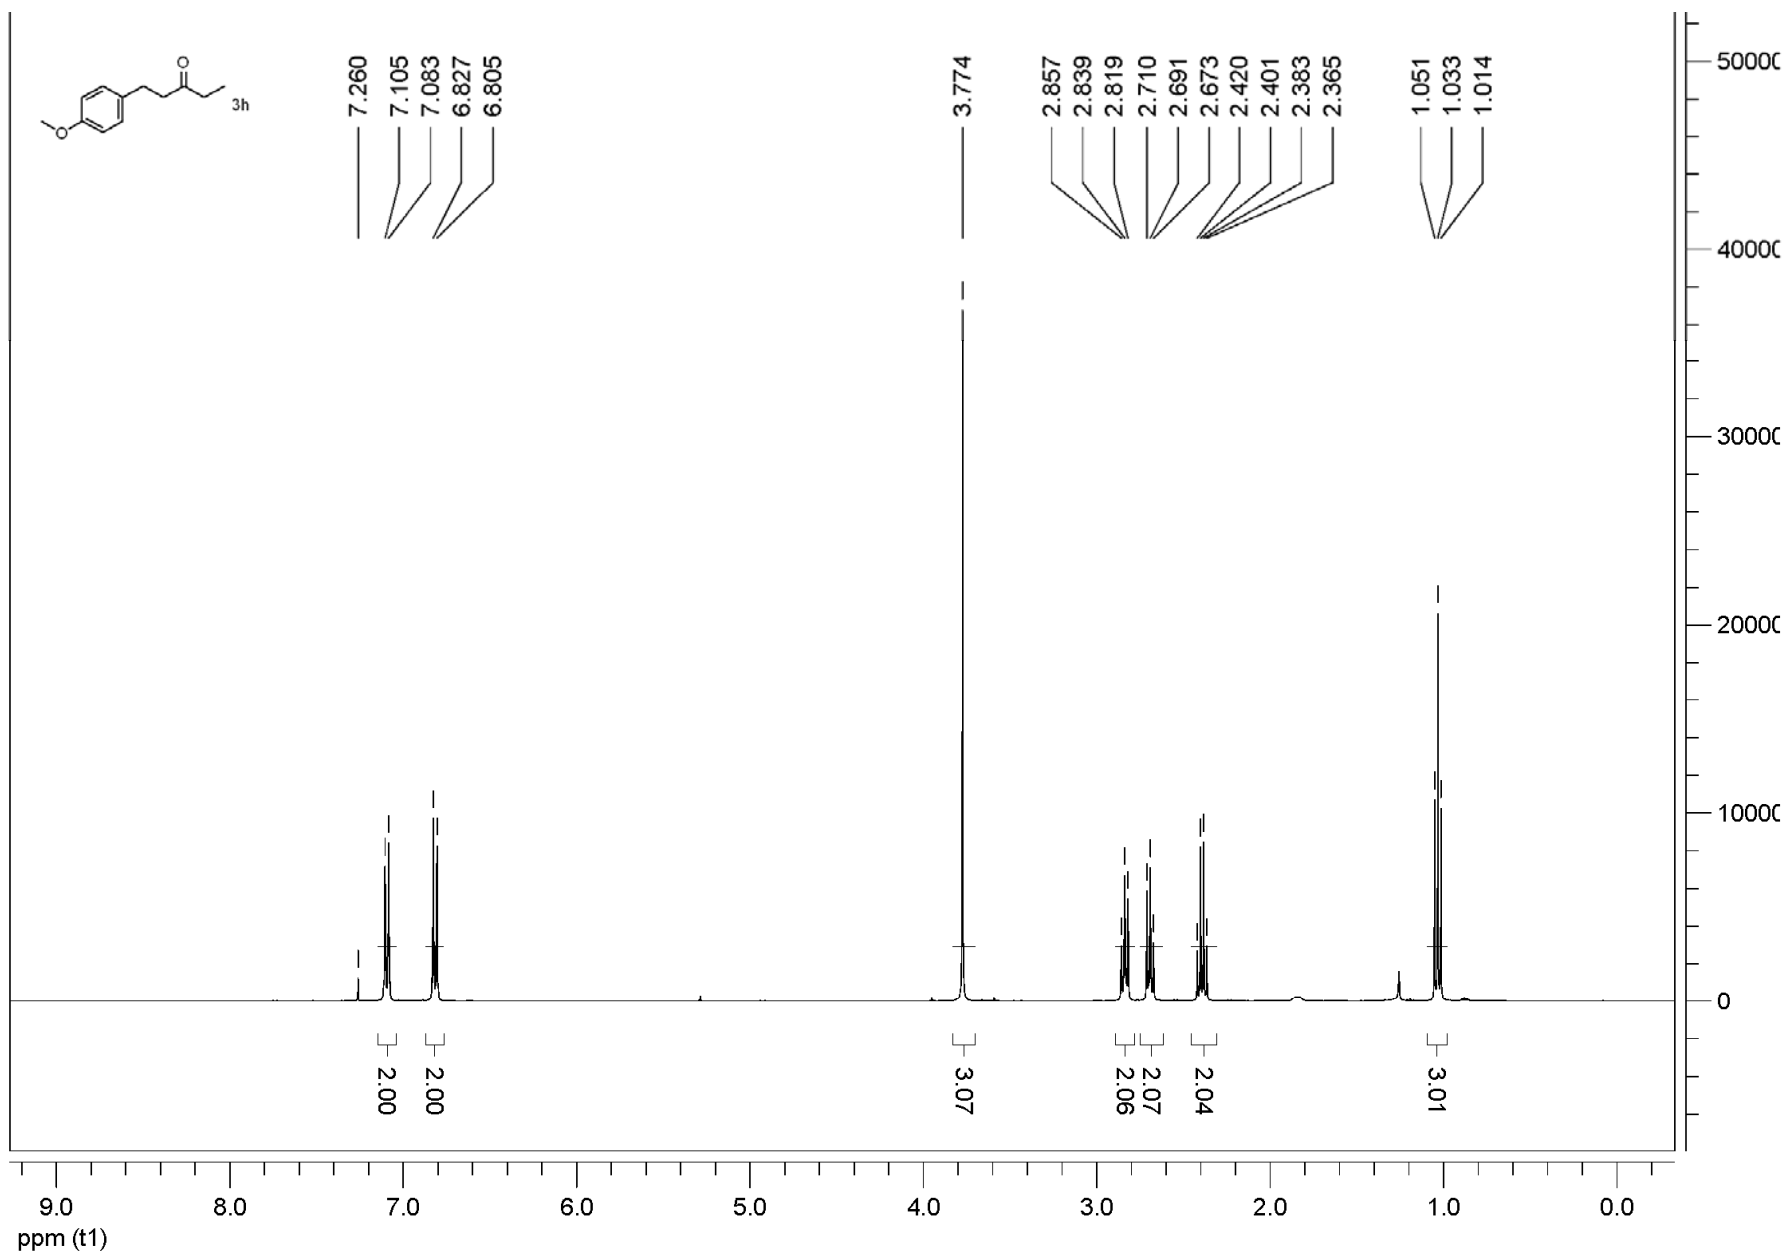



Figure S16.  $^{13}\text{C}$  NMR of 1-(4-methoxyphenyl)pentan-3-one (**3h**)

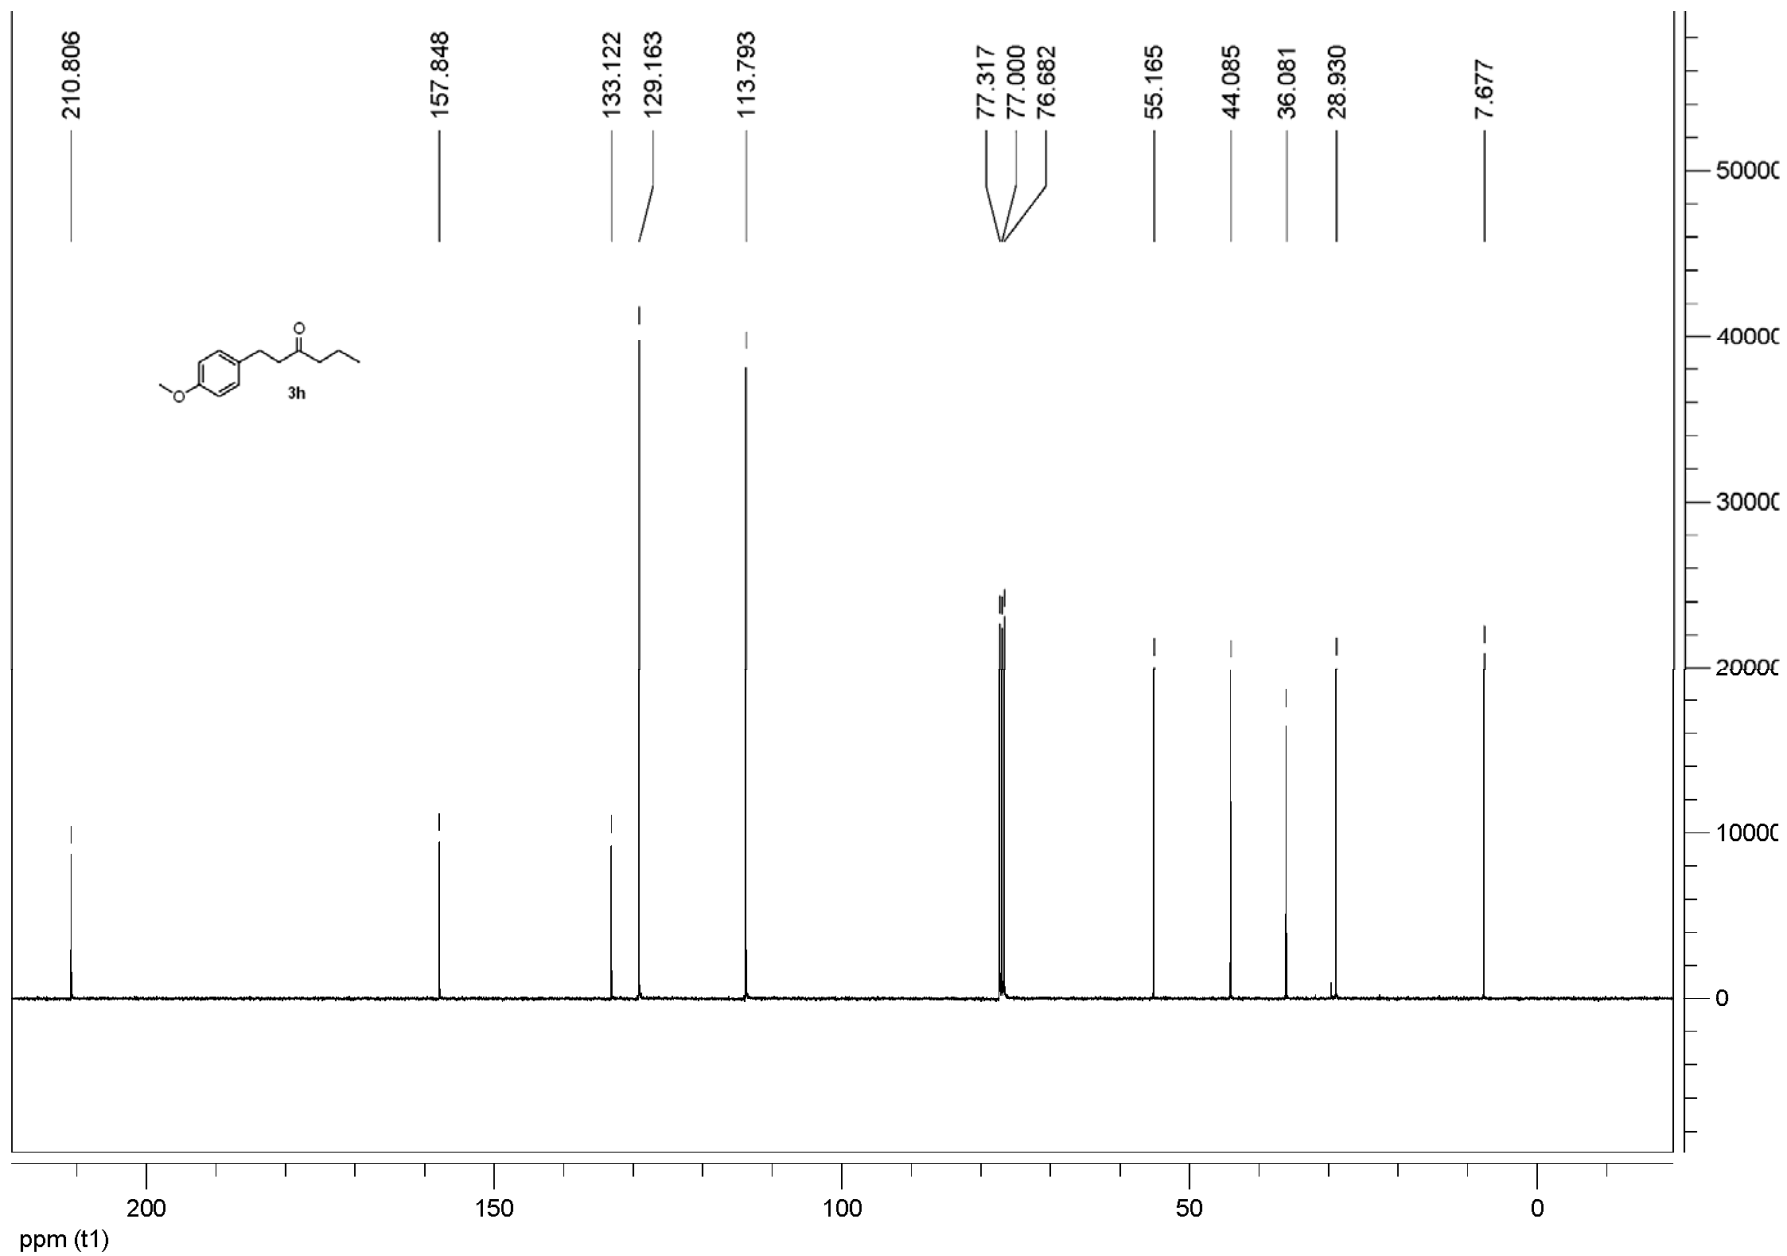

Figure S17.  $^1\text{H}$  NMR of 1-(4-methoxyphenyl)pentanone (**3i**)

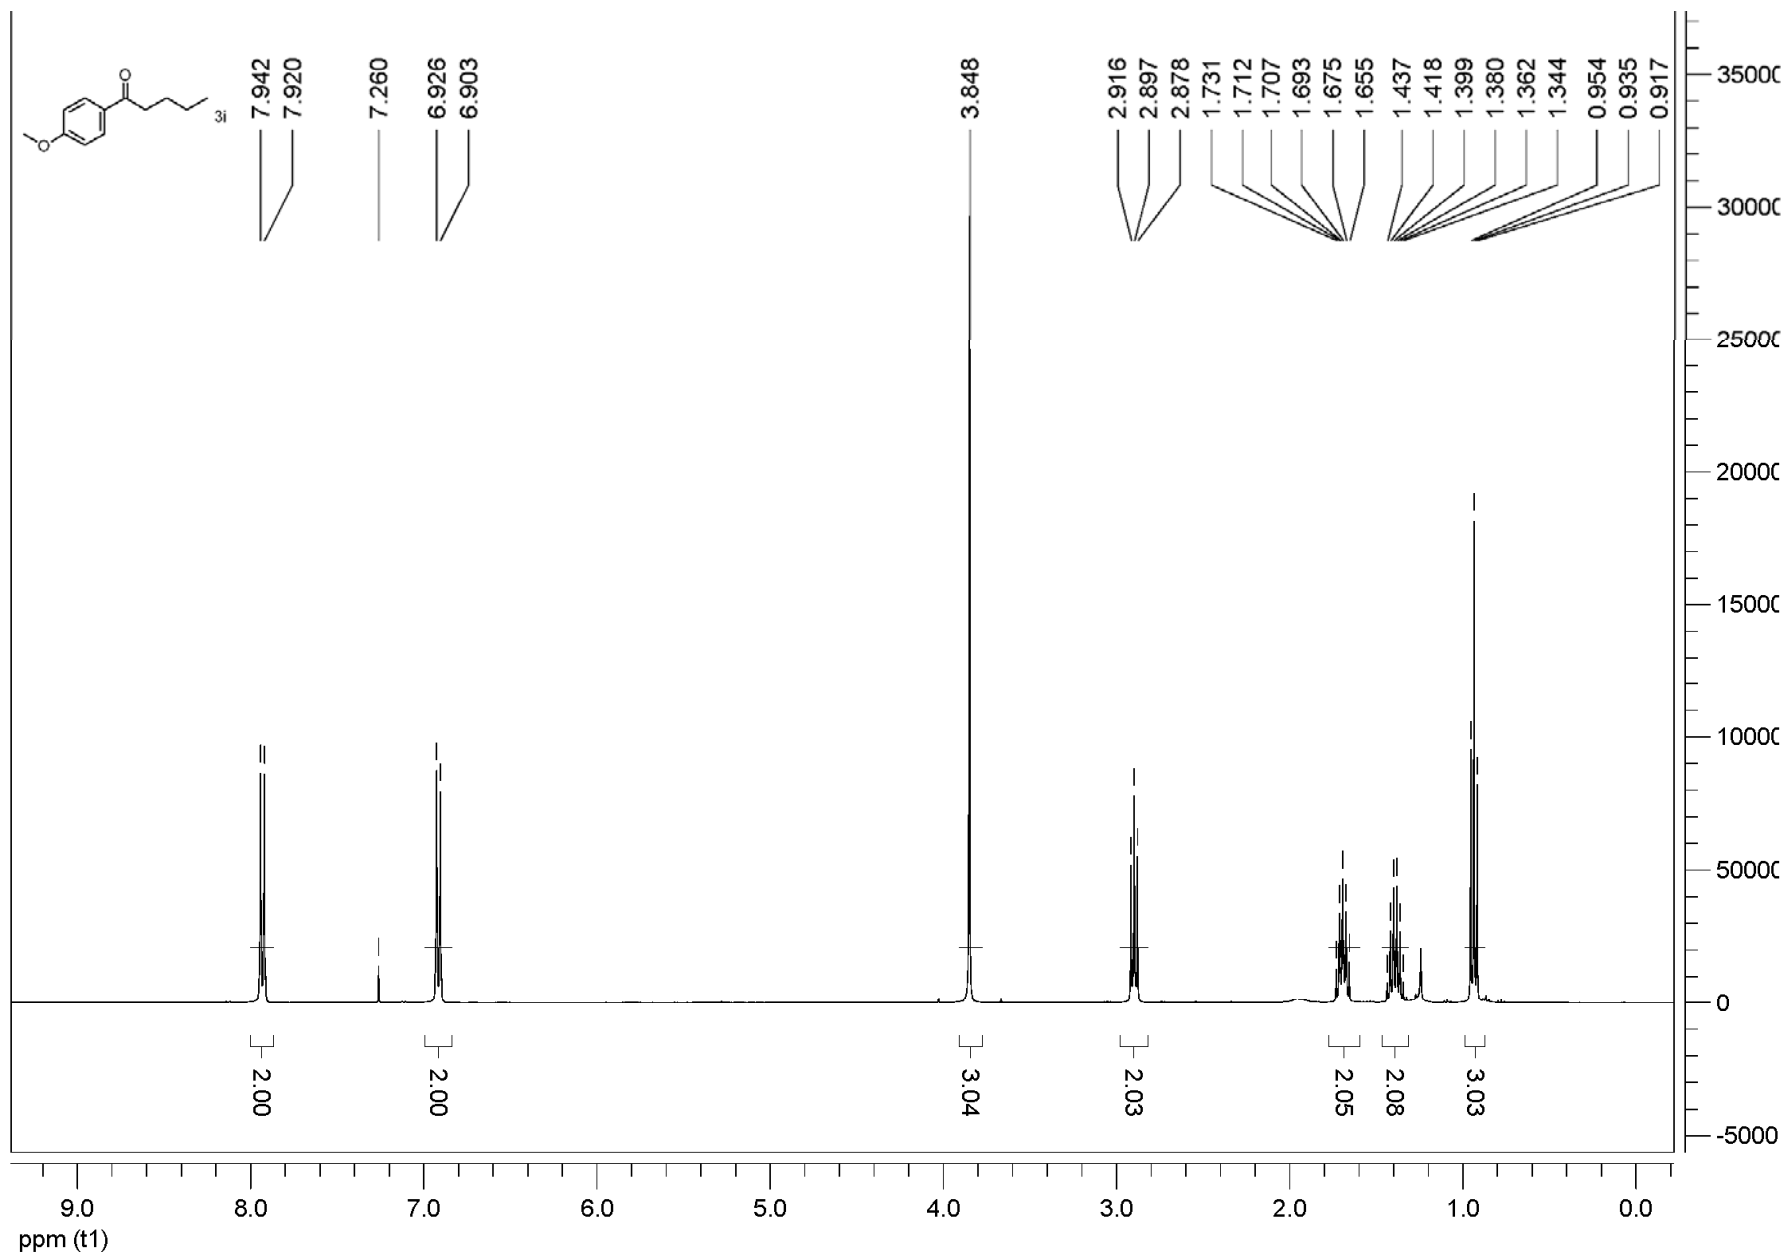

Figure S18.  $^{13}\text{C}$  NMR of 1-(4-methoxyphenyl)pentanone (**3i**)

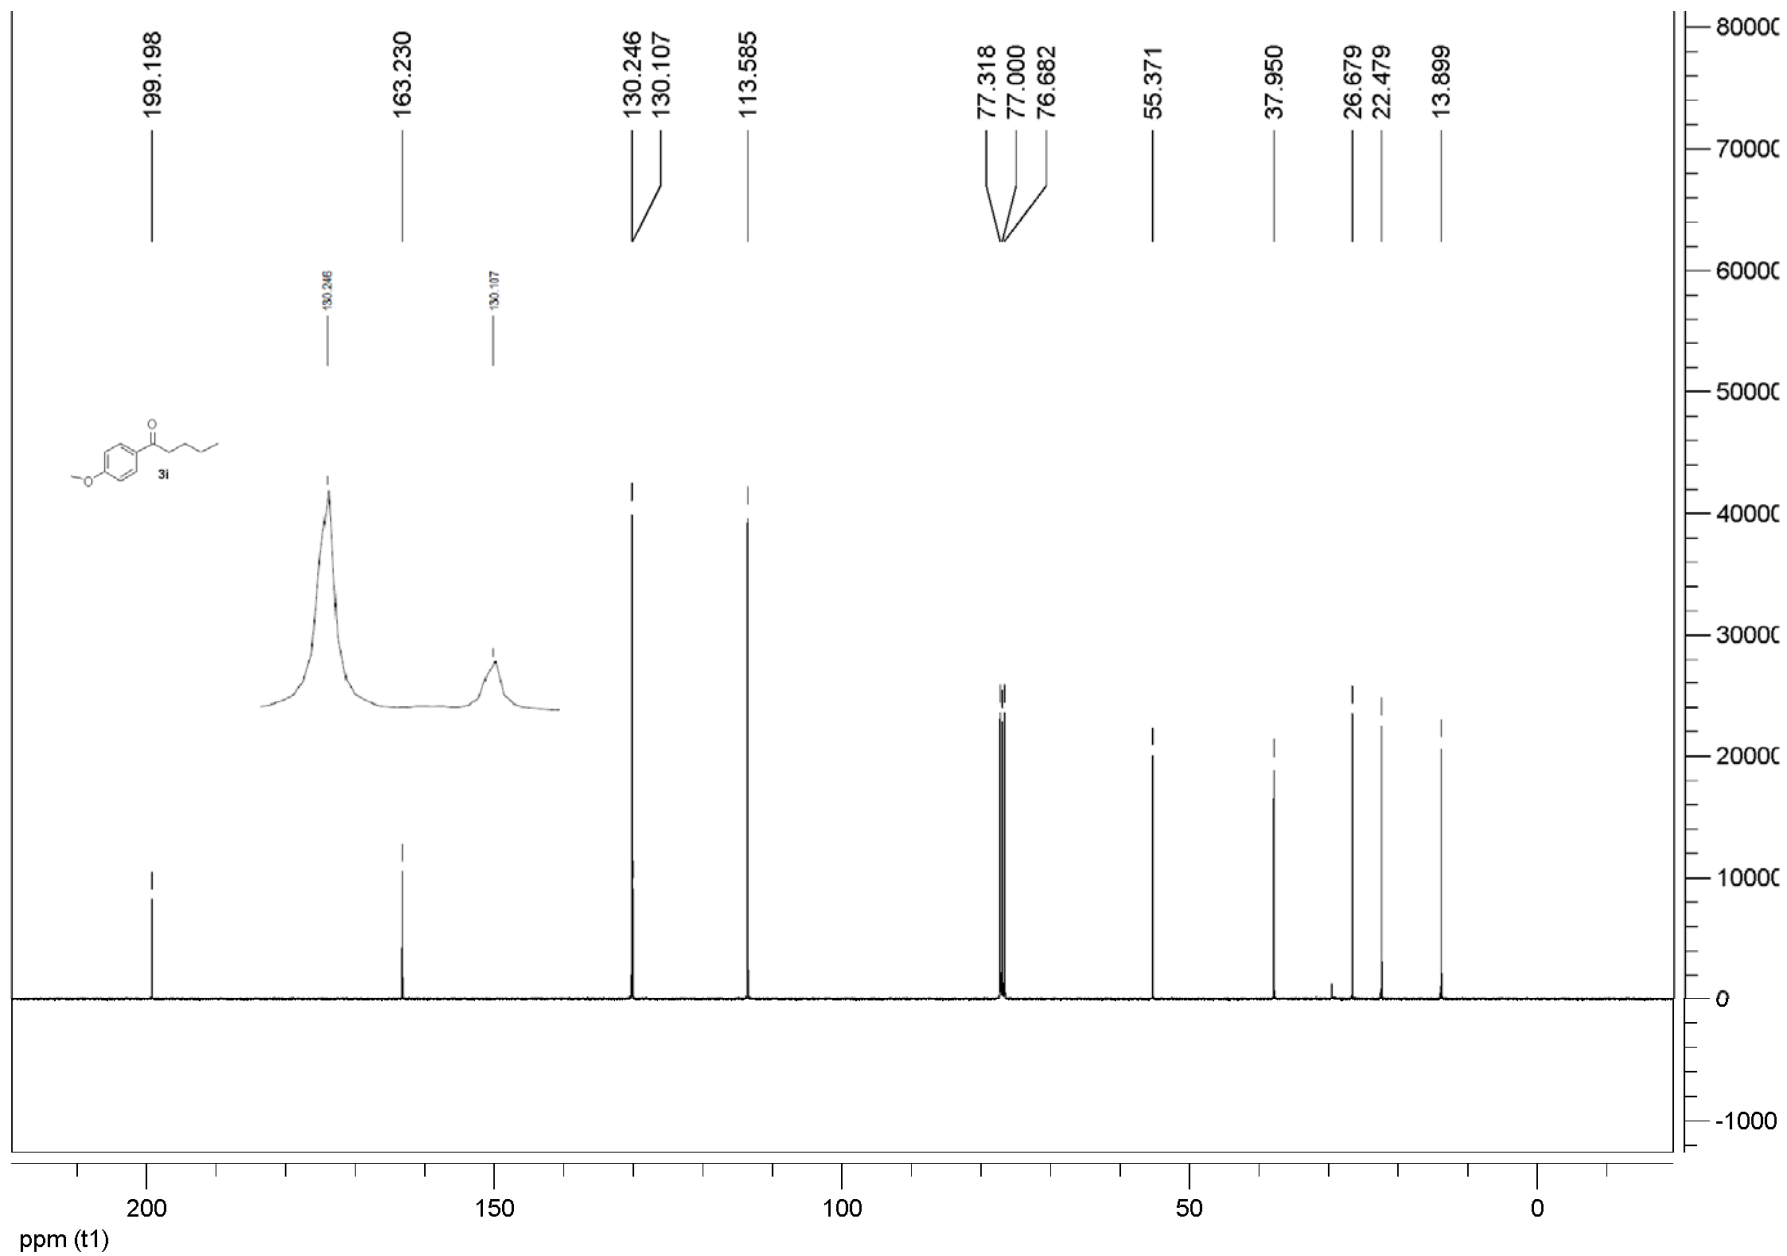

Figure S19.  $^1\text{H}$  NMR of 1-(4-methoxyphenyl)nonanone (**3j**)

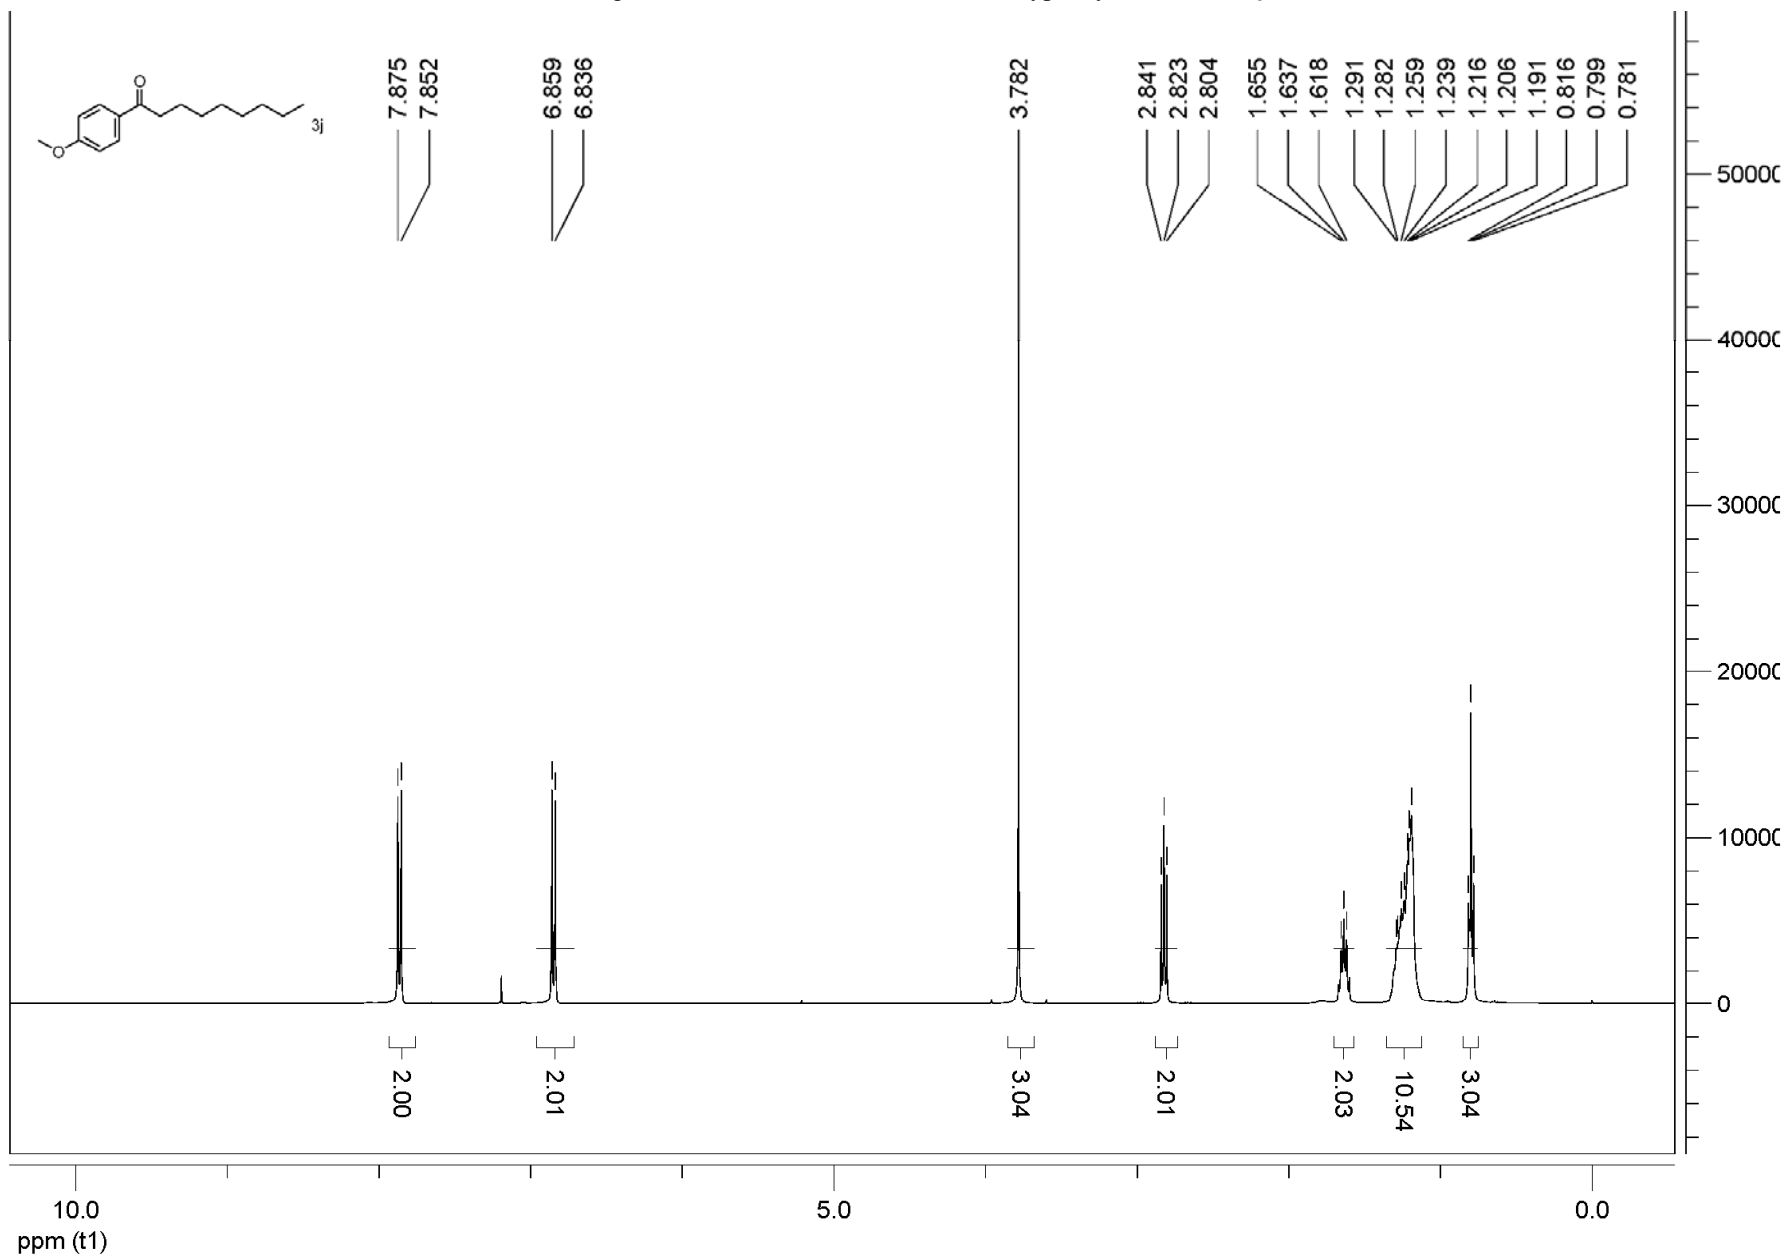

Figure S20.  $^{13}\text{C}$  NMR of 1-(4-methoxyphenyl)nonanone (**3j**)

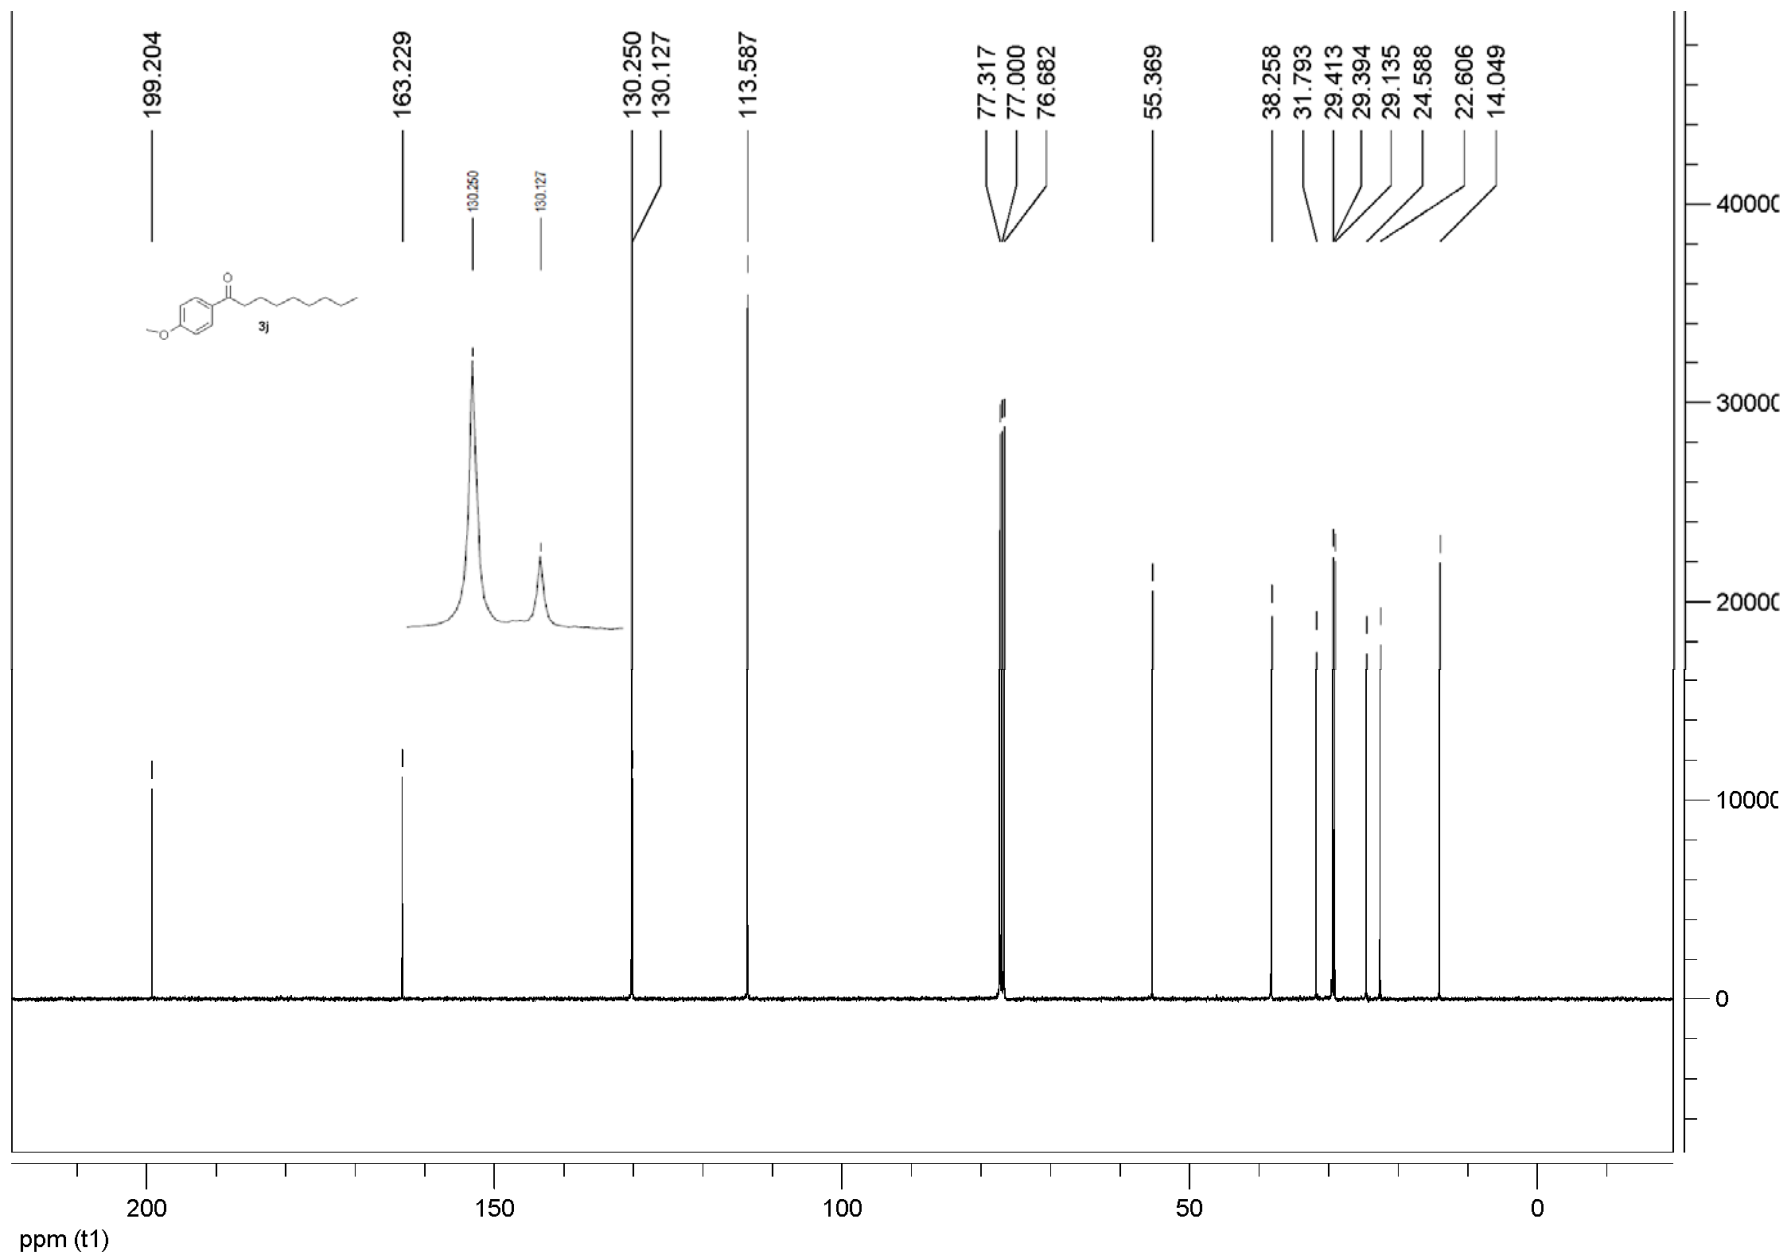

Figure S21.  $^1\text{H}$  NMR of 1-(4-methoxyphenyl)-3-phenylbutanone (**3k**)

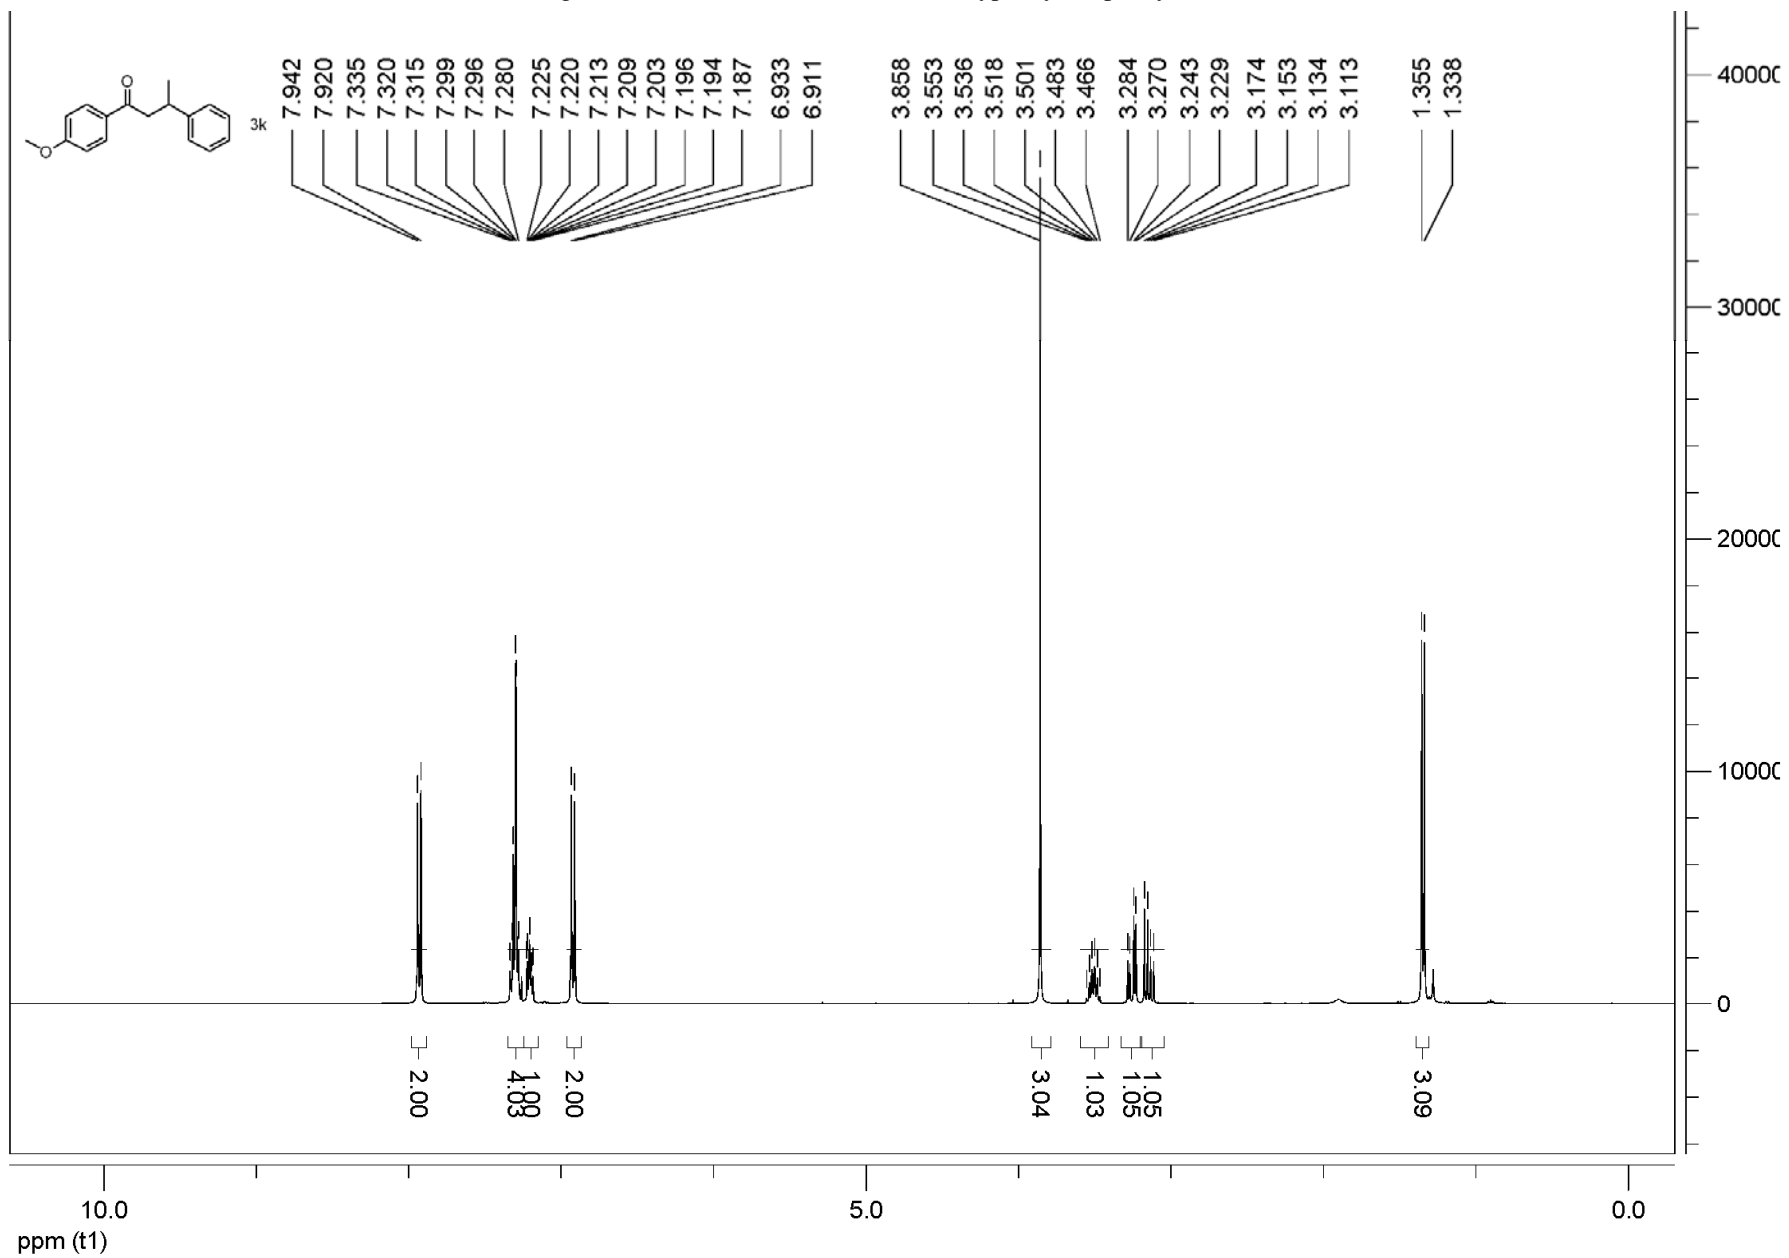

Figure S22.  $^{13}\text{C}$  NMR of 1-(4-methoxyphenyl)-3-phenylbutanone (**3k**)

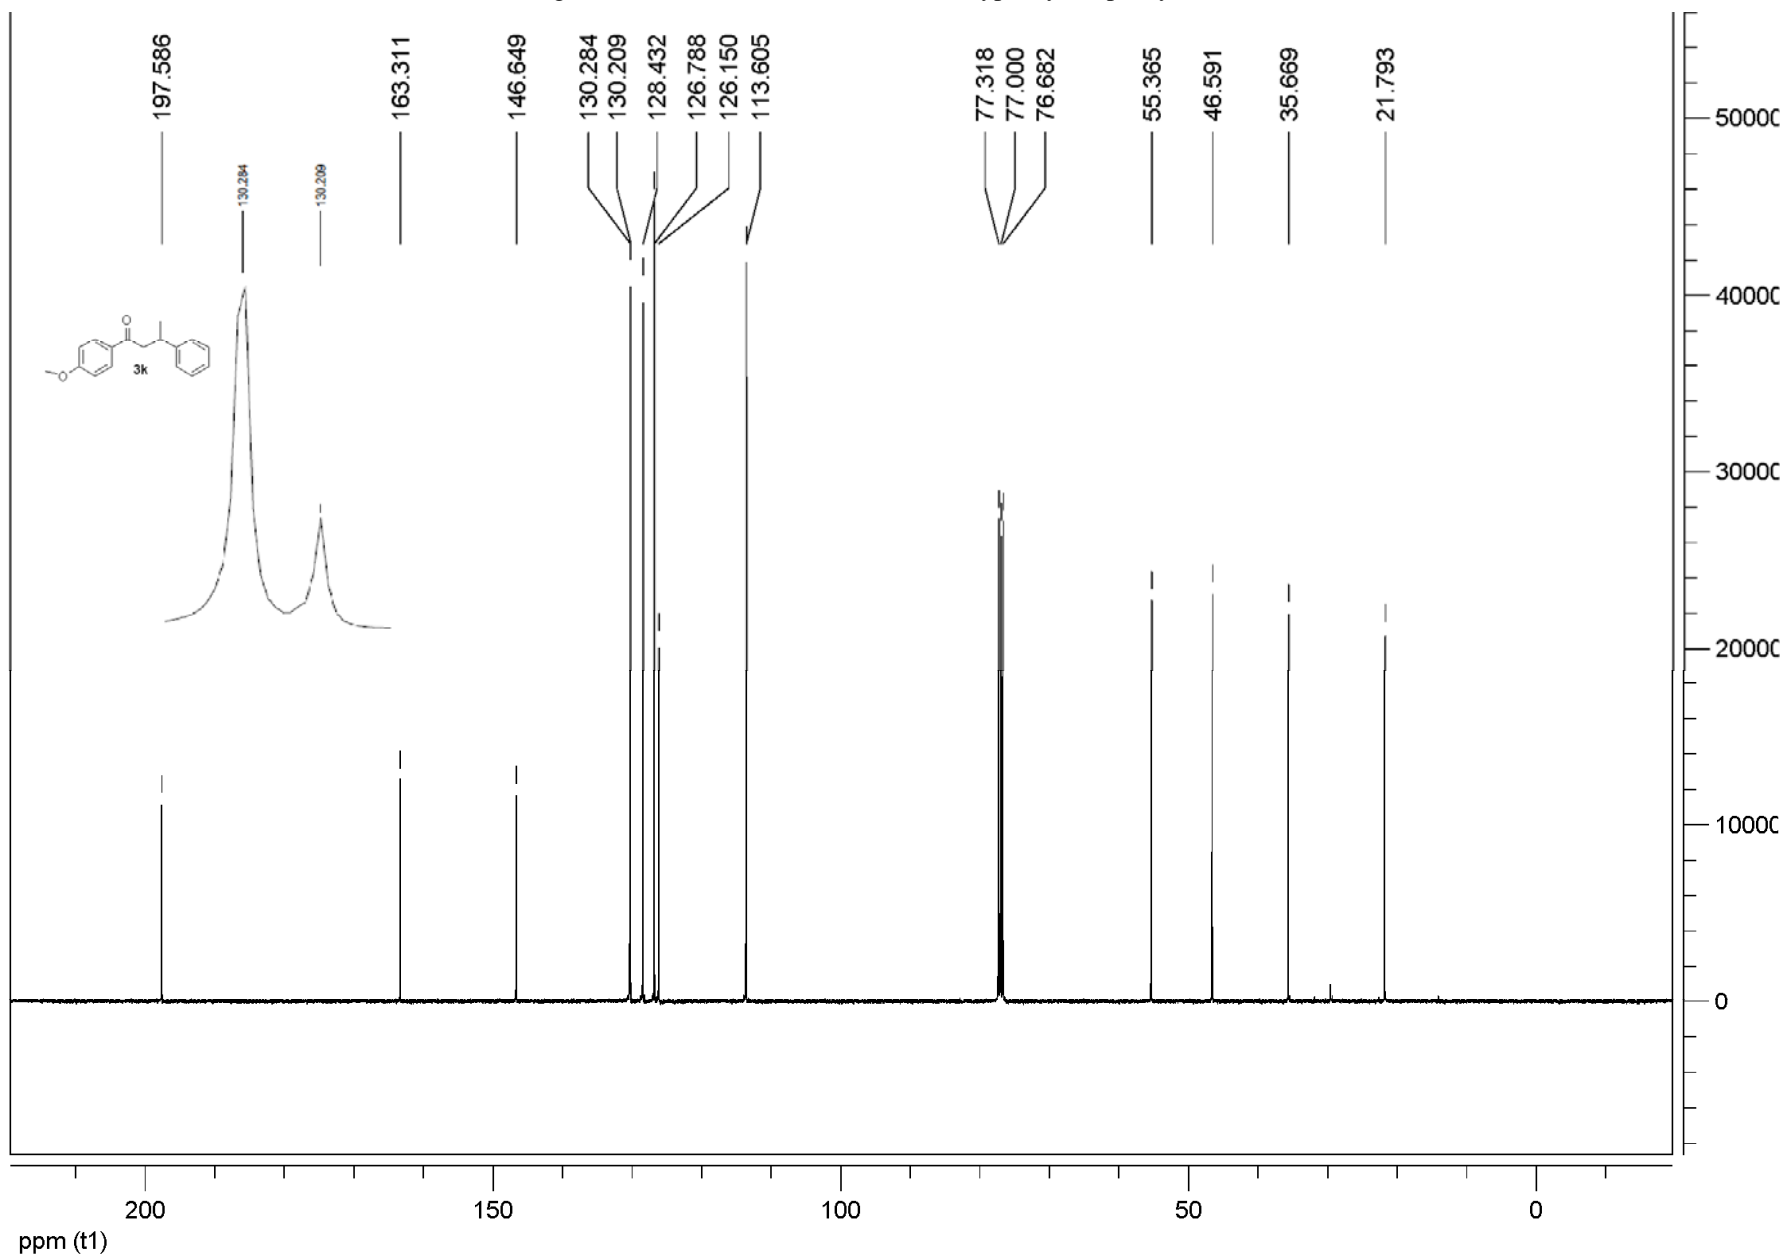

Figure S23.  $^1\text{H}$  NMR of 1-cyclohexyl-3-phenylbutanone (**31**)

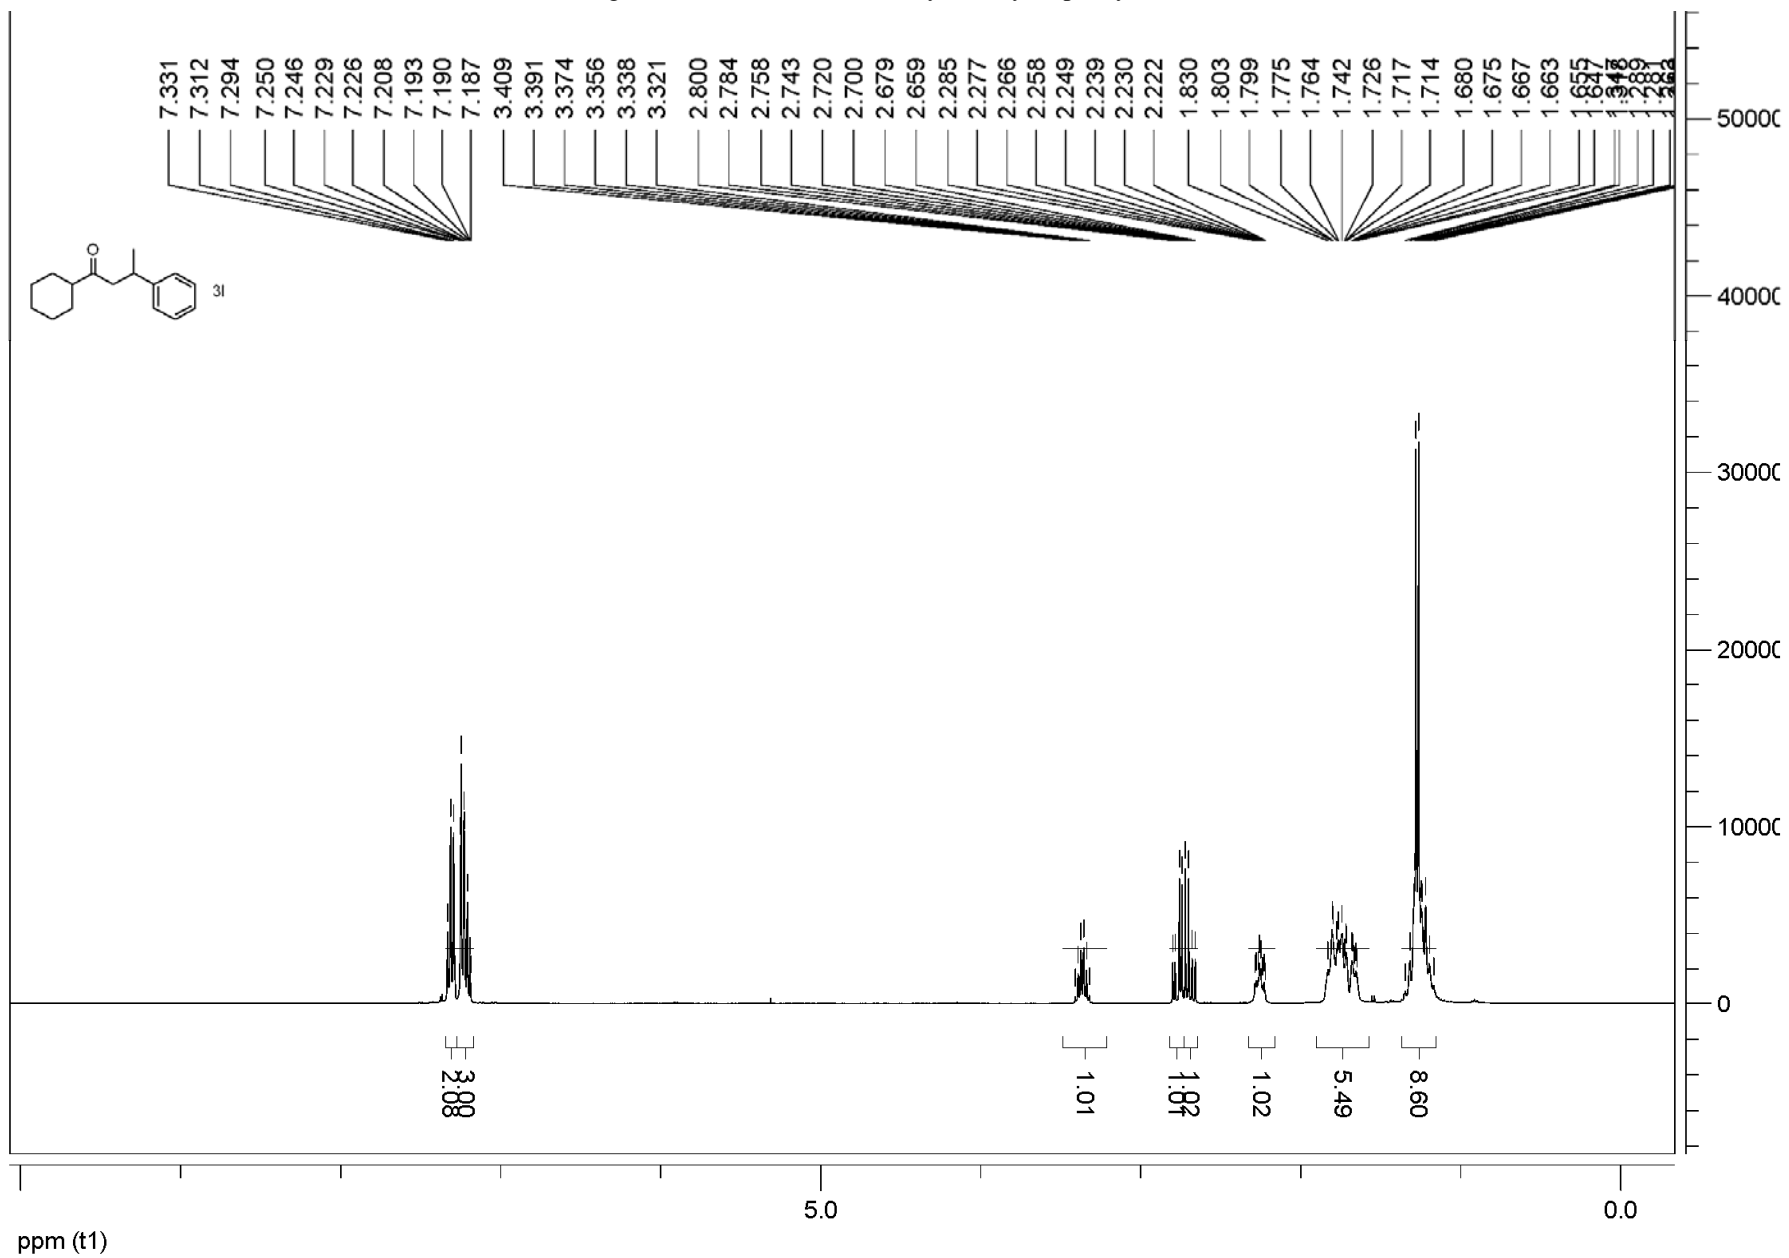



Figure S24.  $^{13}\text{C}$  NMR of 1-cyclohexyl-3-phenylbutanone (**31**)

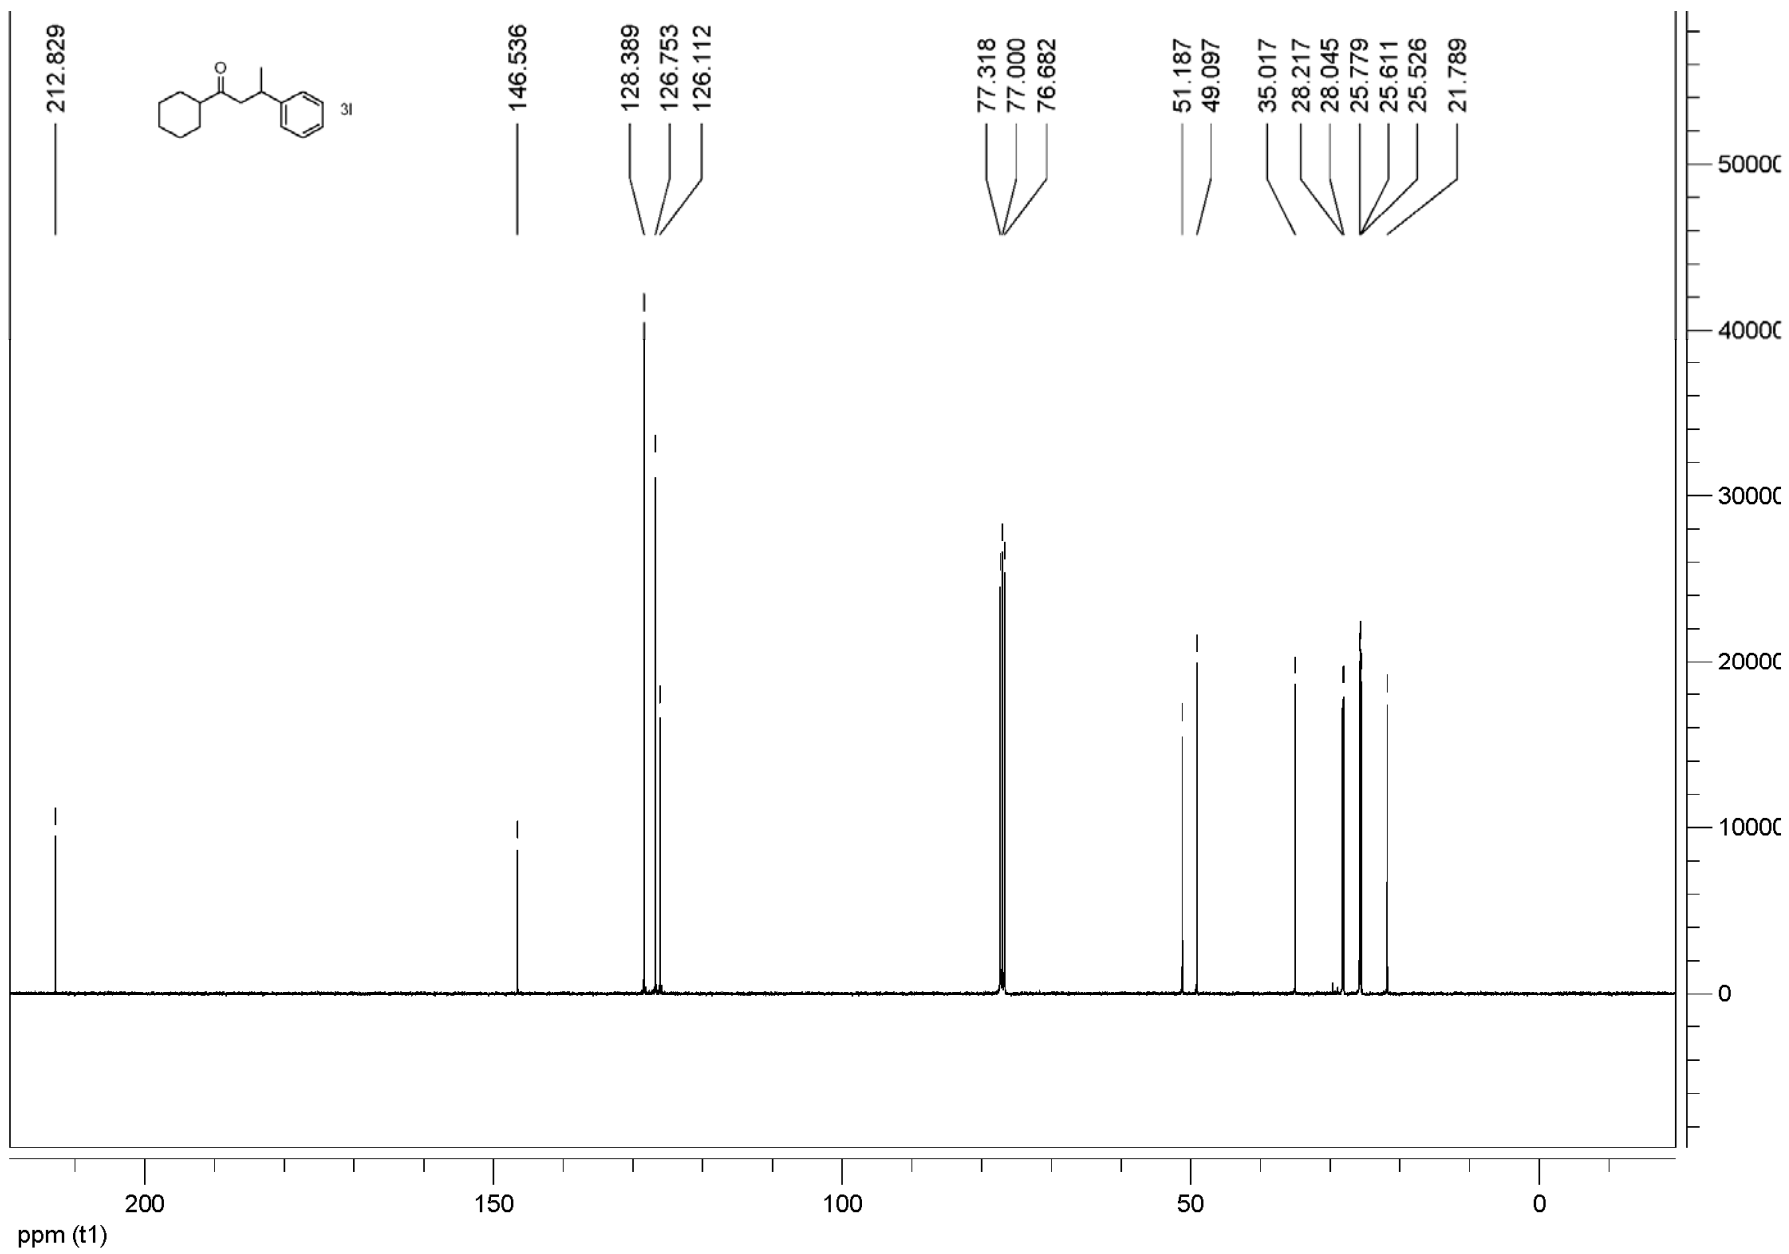

Figure S25.  $^1\text{H}$  NMR of 3-phenyl-1-(thiophen-2-yl)butanone (**3m**)

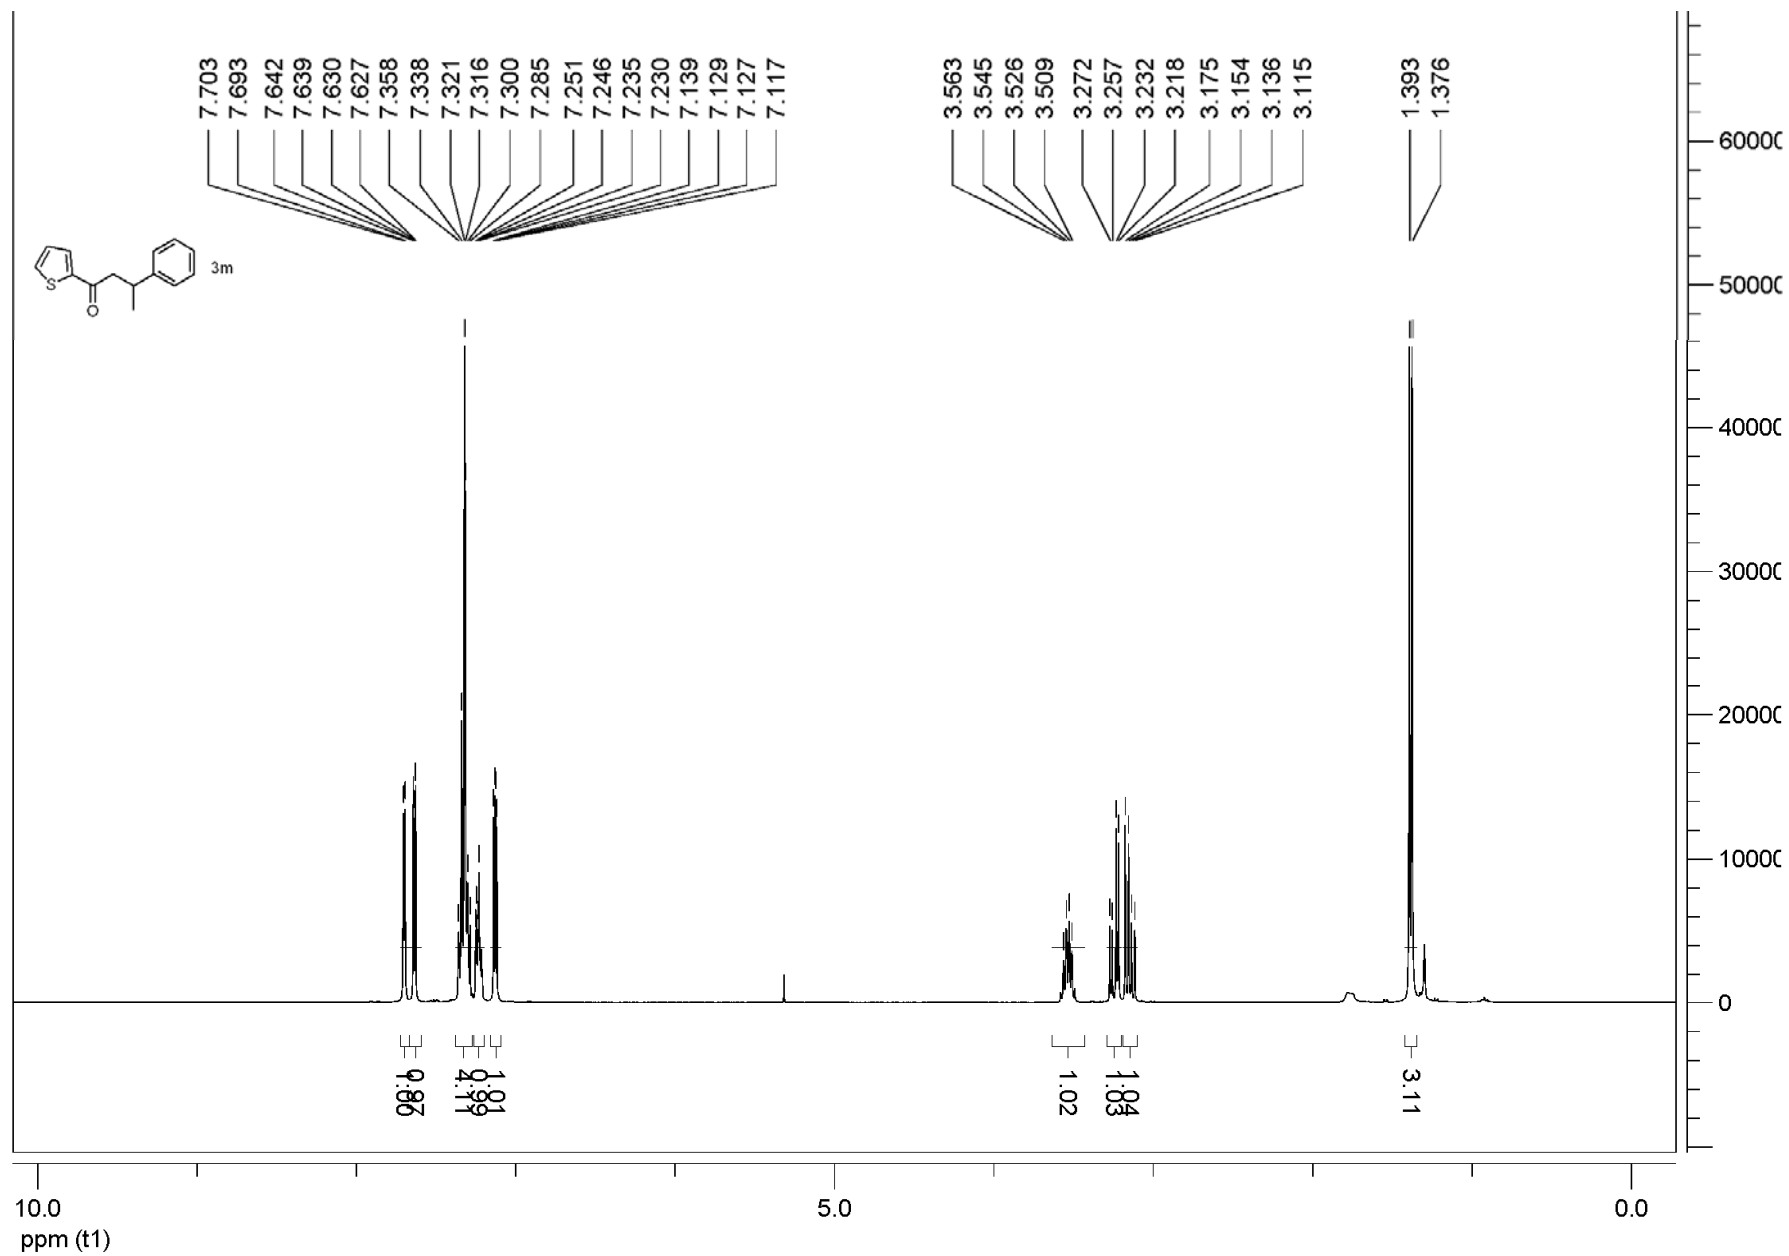

Figure S26.  $^{13}\text{C}$  NMR of 3-phenyl-1-(thiophen-2-yl)butanone (**3m**)

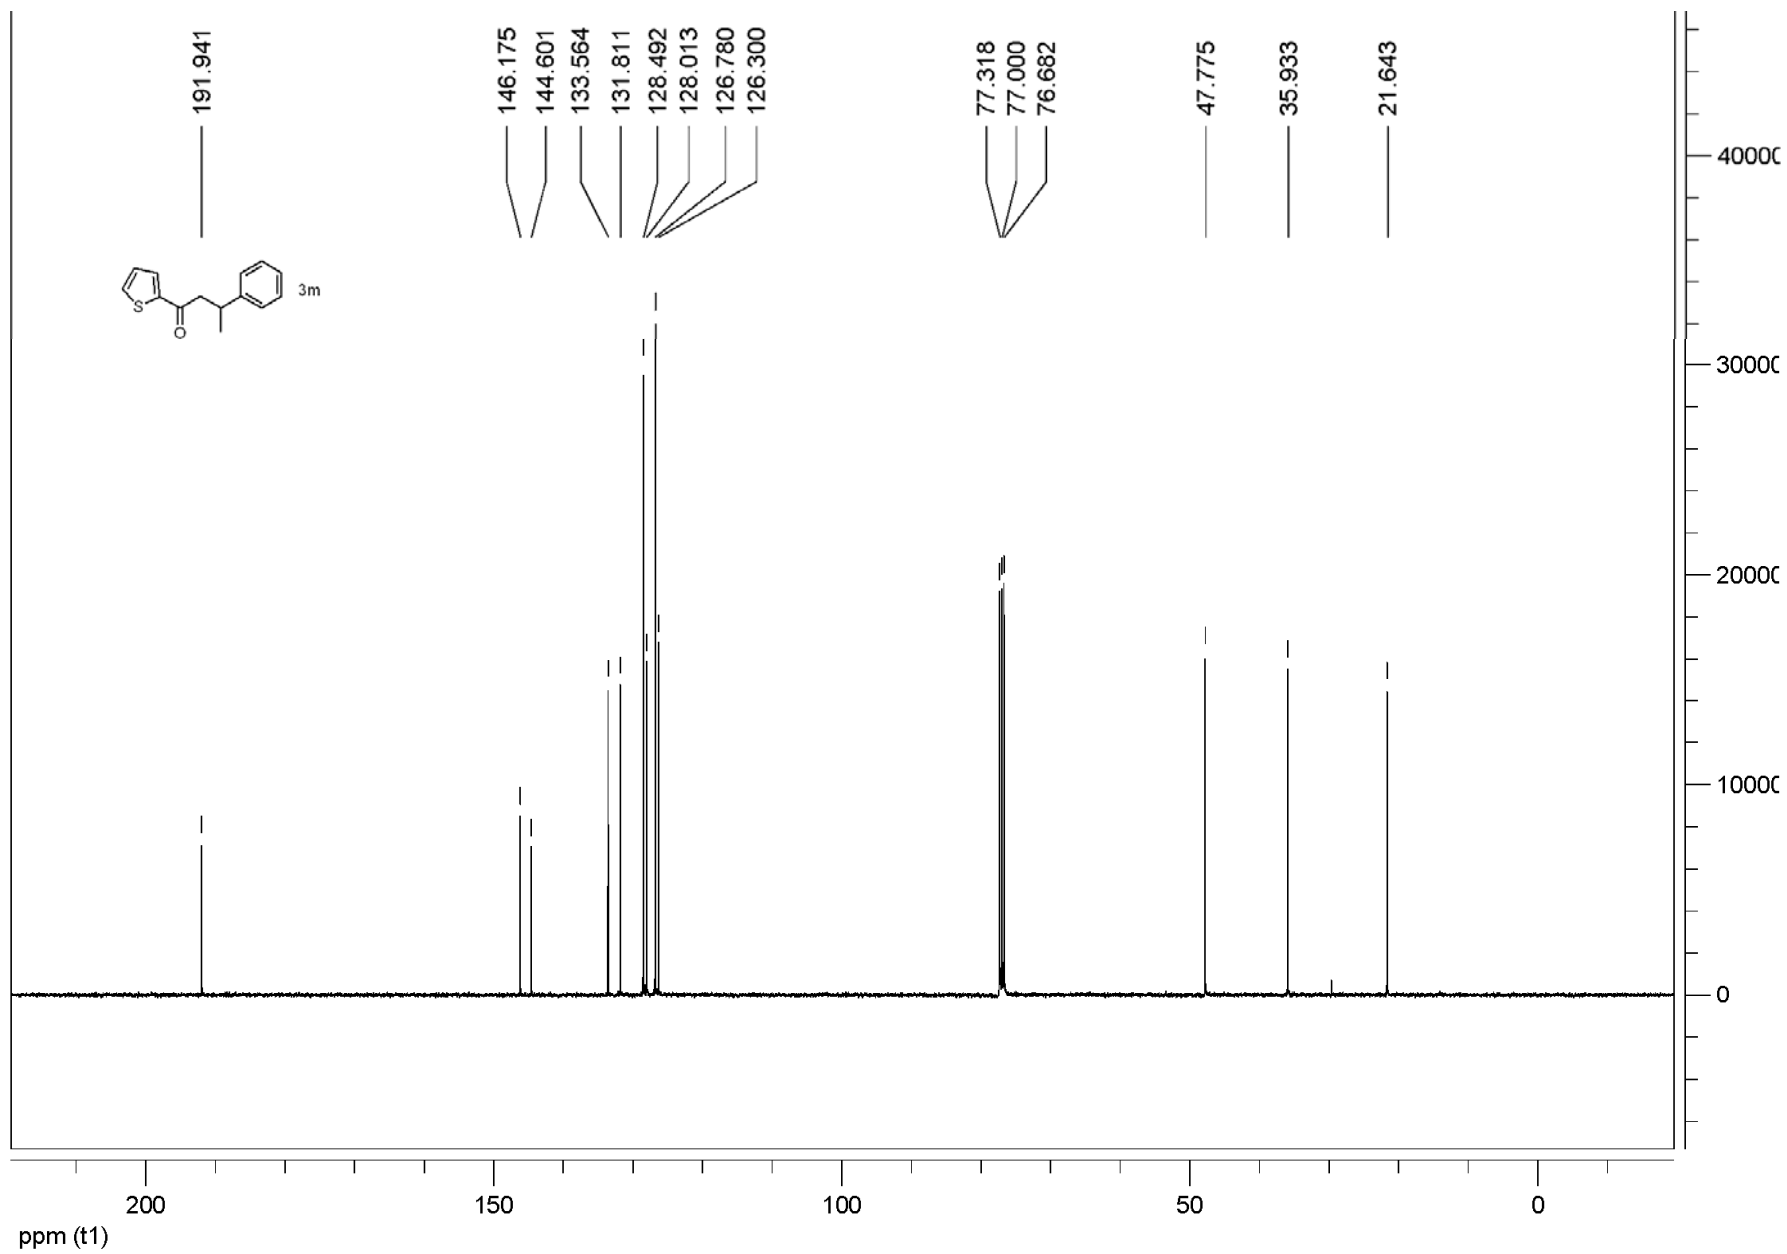

Figure S27.  $^1\text{H}$  NMR of 1-phenylnonanone (**3n**)

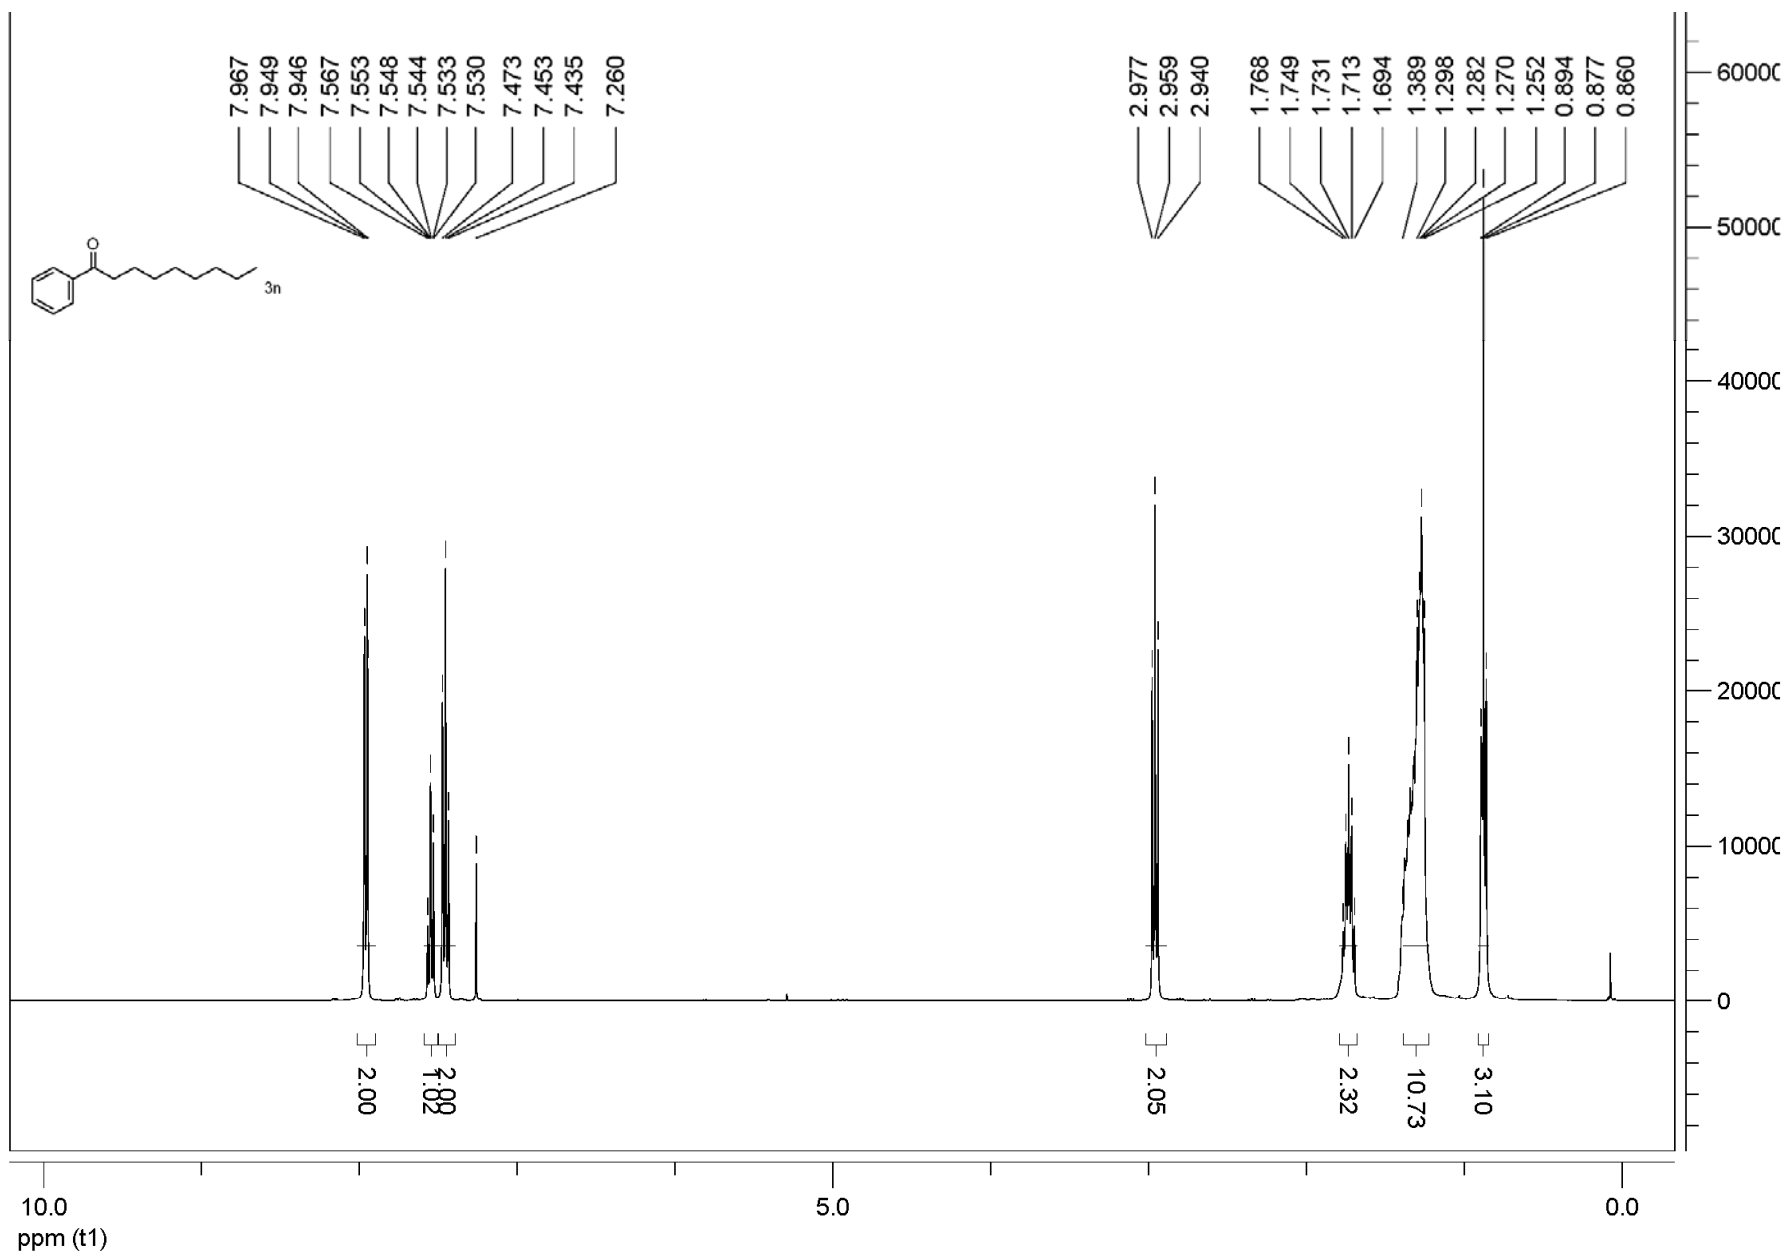

Figure S28.  $^{13}\text{C}$  NMR of 1-phenylnonanone (**3n**)

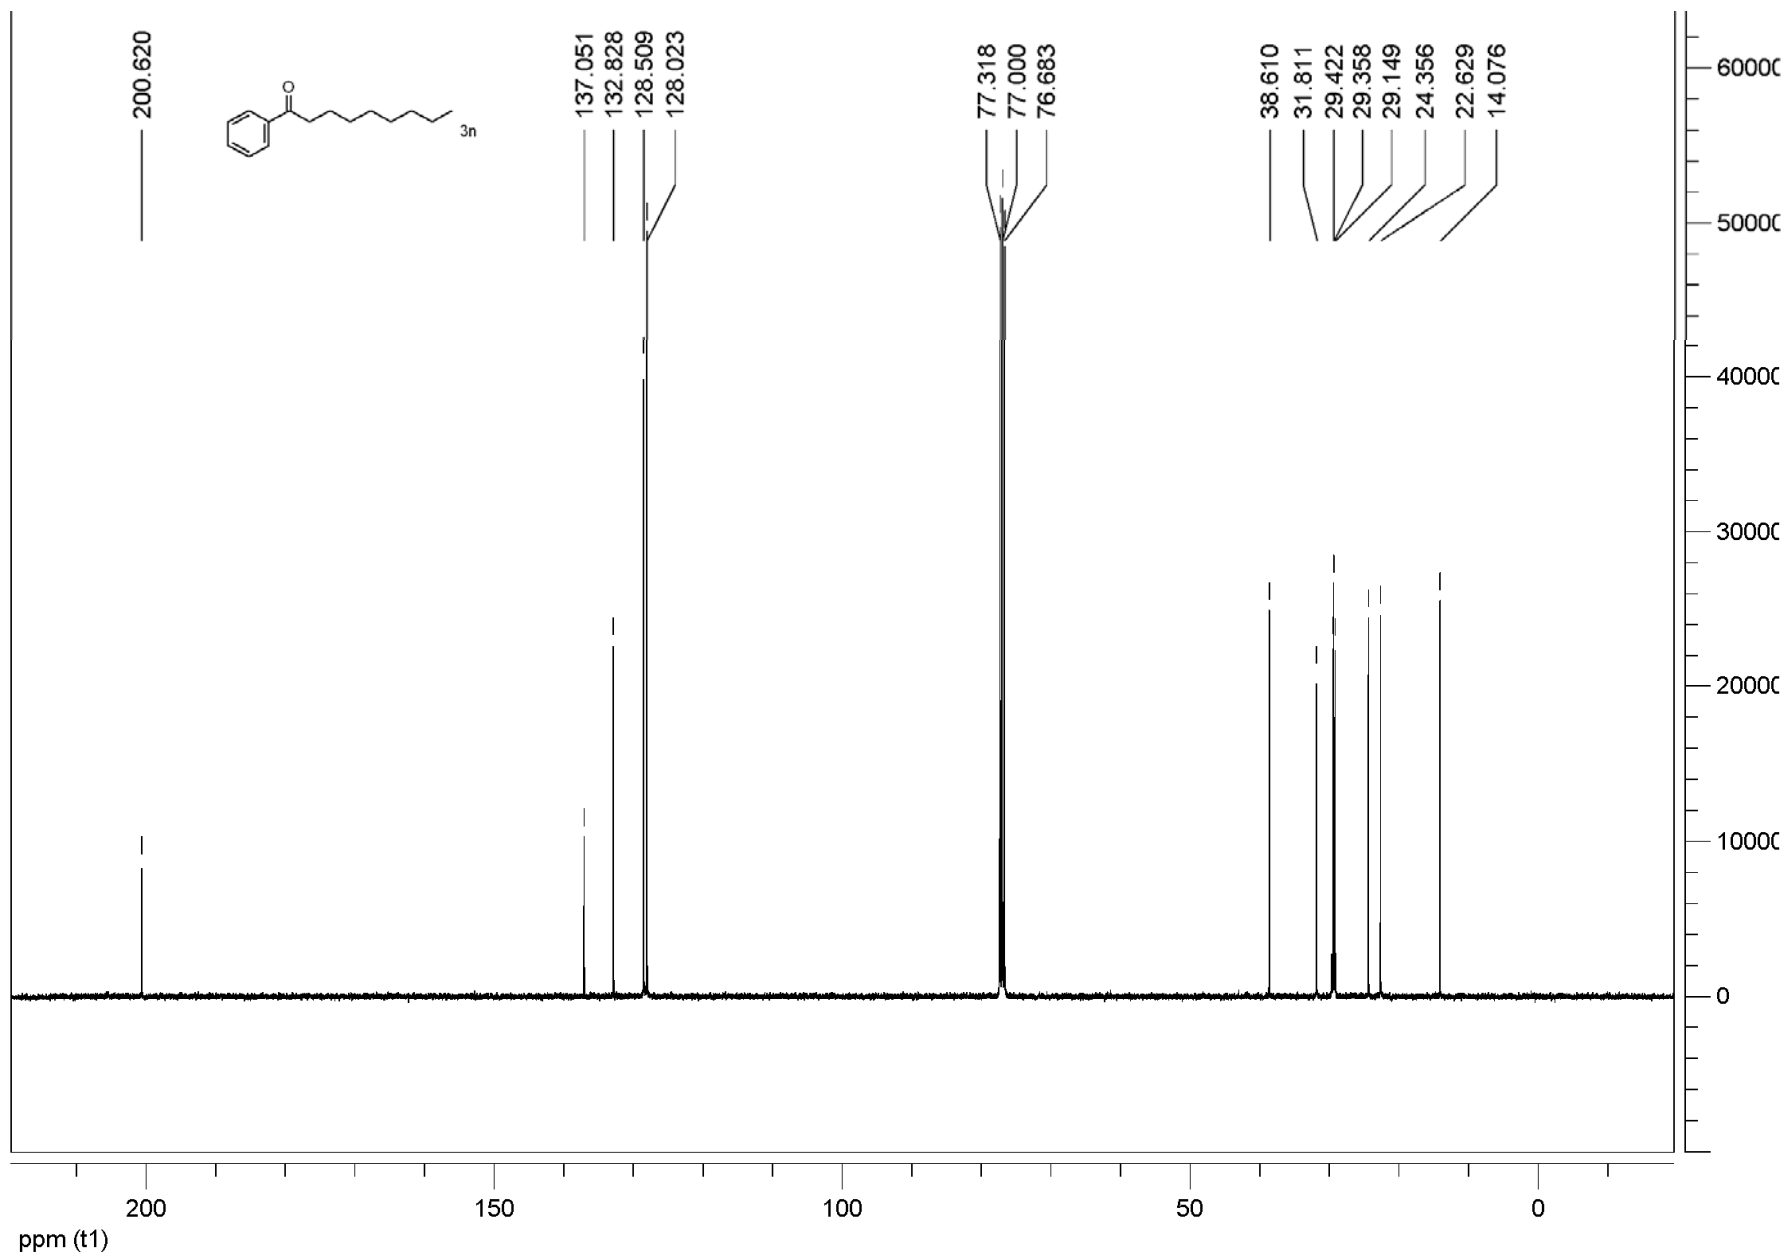

Figure S29. HRMS of 1-cyclohexyl-3-phenylbutanone (**31**)

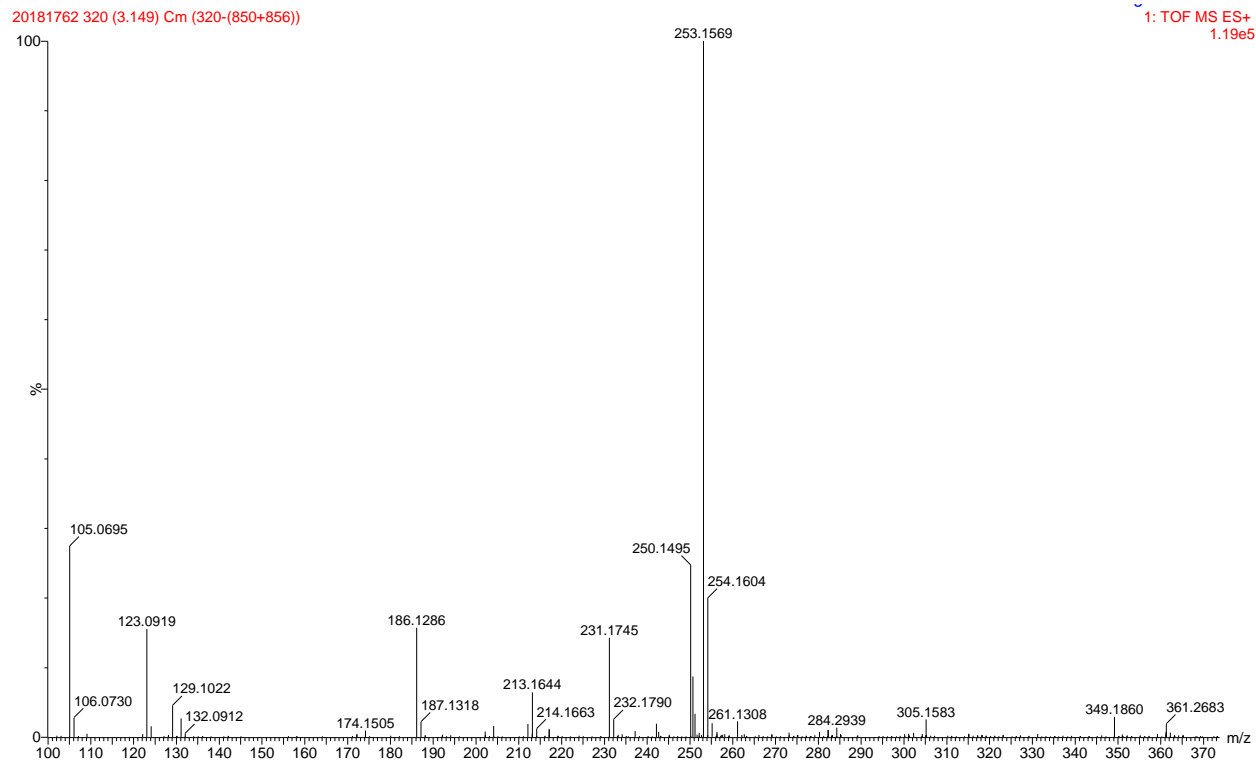

**Elemental Composition Report**

Multiple Mass Analysis: 2 mass(es) processed

Tolerance = 5.0 PPM / DBE: min = -1.5, max = 50.0

Element prediction: Off

Number of isotope peaks used for i-FIT = 3

**Monoisotopic Mass, Even Electron Ions**

808 formula(e) evaluated with 2 results within limits (all results (up to 1000) for each mass)

Elements Used:

| 12C: 0-50 | 13C: 0-1 | H: 0-50            | O: 0-5 | Na: 0-1 |     |      |      |      |
|-----------|----------|--------------------|--------|---------|-----|------|------|------|
| Minimum:  | 10.00    |                    |        |         |     |      |      | -1.5 |
| Maximum:  | 100.00   |                    |        |         | 5.0 | 5.0  | 50.0 |      |
| Mass      | RA       | Calc. Mass         | mDa    | Formula | PPM | DBE  |      |      |
| i-FIT     | Norm     | Conf(%)            |        |         |     |      |      |      |
| 253.1569  | 100.00   | 253.1568           | 0.1    | 0.4     | 5.5 | 44.5 |      | n/a  |
| n/a       |          | 12C16 H22 O Na     |        |         |     |      |      |      |
| 254.1604  | 19.97    | 254.1602           | 0.2    | 0.8     | 5.5 | 27.1 |      | n/a  |
| n/a       |          | 12C15 13C H22 O Na |        |         |     |      |      |      |
